# Supplementary material for: Keto-Enol Tautomerism in Passerini and Ugi Adducts
Source: MDPI journal article supplement (doi:10.3390/molecules26040919), 2021-02-09
Supplement: s1 [file s1]

# Keto-Enol Tautomerism in Passerini and Ugi Adducts

Pablo Pertejo, Andrea Sancho-Medina, Tomás Hermosilla, Beatriz González-Saiz, Javier Gómez-Ayuso, Roberto Quesada, Daniel Moreno, Israel Carreira-Barral\* and María García-Valverde\*

## Contents

NMR and high-resolution mass spectra of the compounds

X-ray diffraction studies

## NMR and high-resolution mass spectra of the compounds

### 1-(Cyclohexylamino)-1,3-dioxo-3-phenylpropan-2-yl propionate (5)

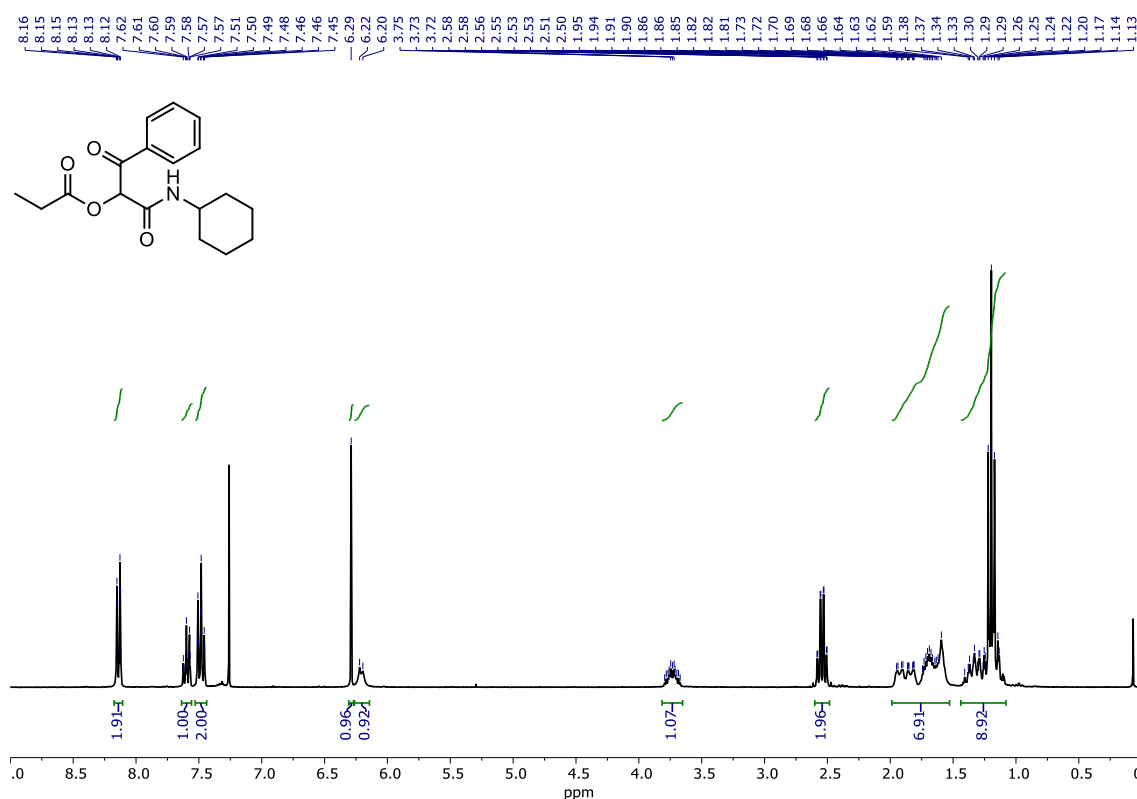

Figure 1. <sup>1</sup>H NMR spectrum of 5 (300 MHz, CDCl<sub>3</sub>).

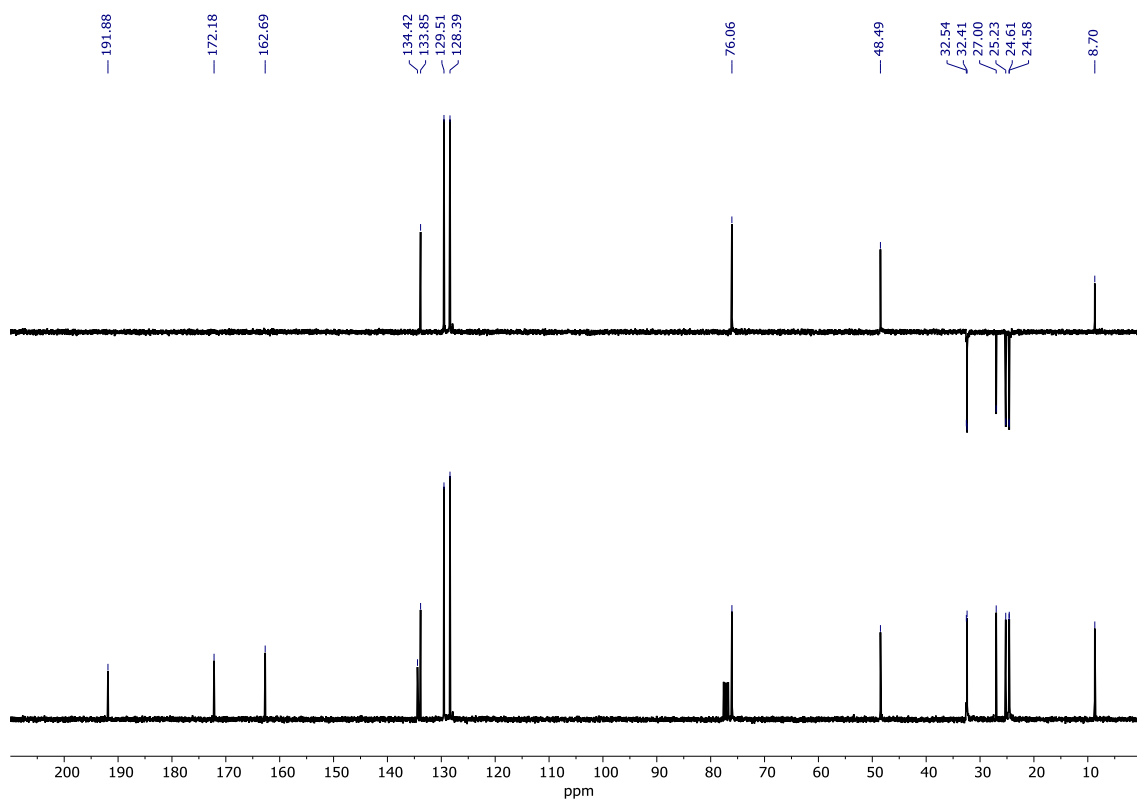

Figure 2.  $^{13}\text{C}$  and DEPT-135 NMR spectra of 5 (75 MHz,  $\text{CDCl}_3$ ).

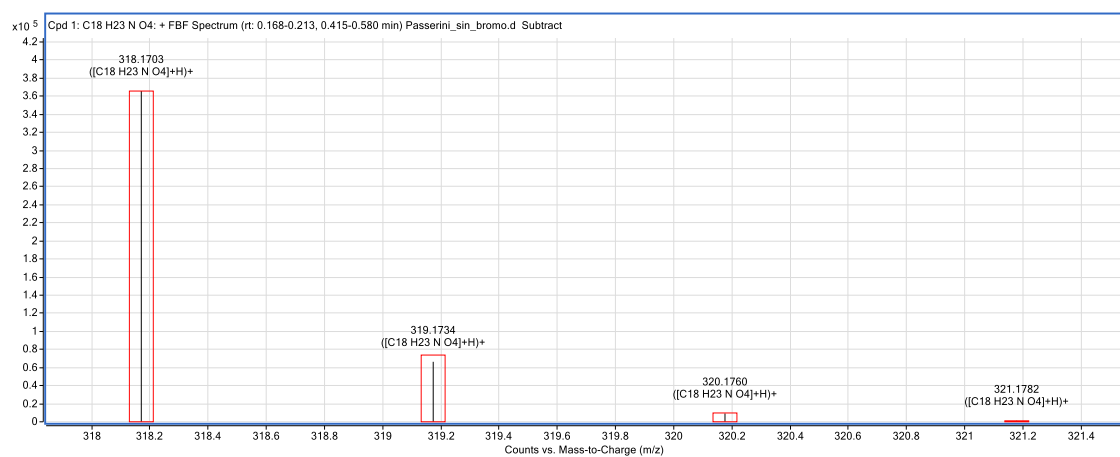

Figure 3. High-resolution mass spectrum of 5.

**(E)-2-(N-Benzylpropionamido)-N-cyclohexyl-3-hydroxy-3-phenylacrylamide (6)**

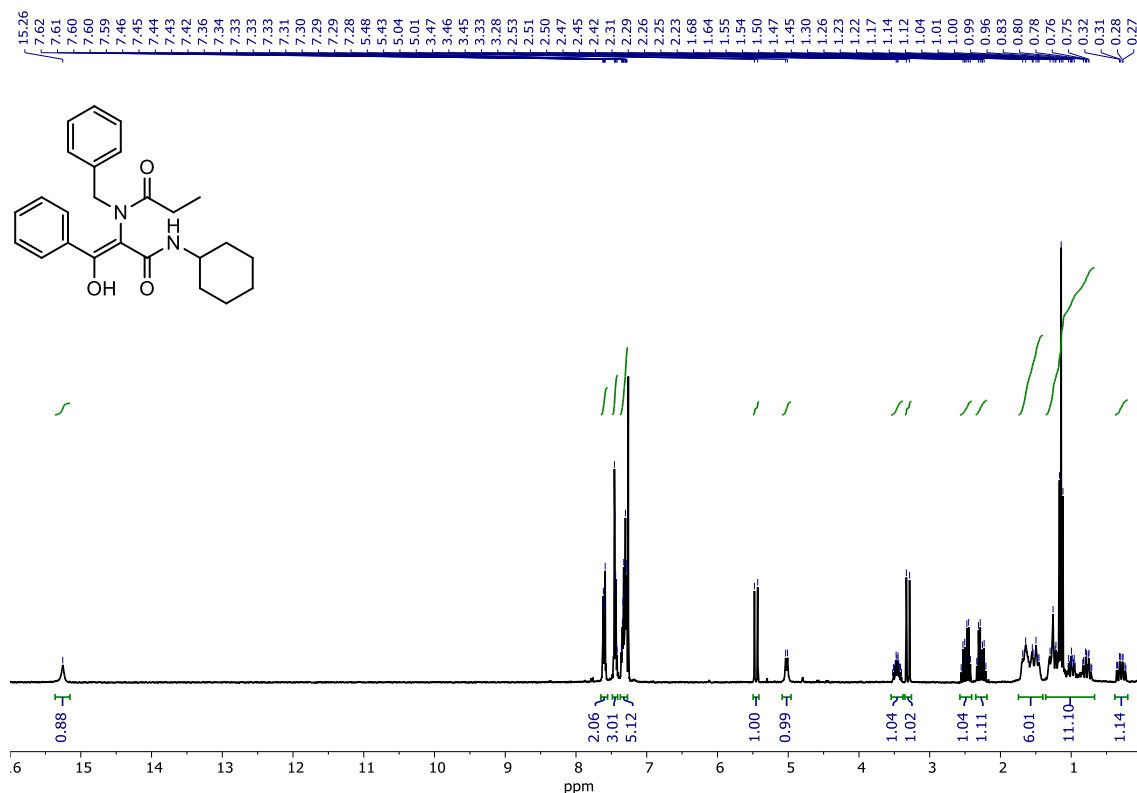

**Figure 4.** <sup>1</sup>H NMR spectrum of **6** (300 MHz, CDCl<sub>3</sub>).

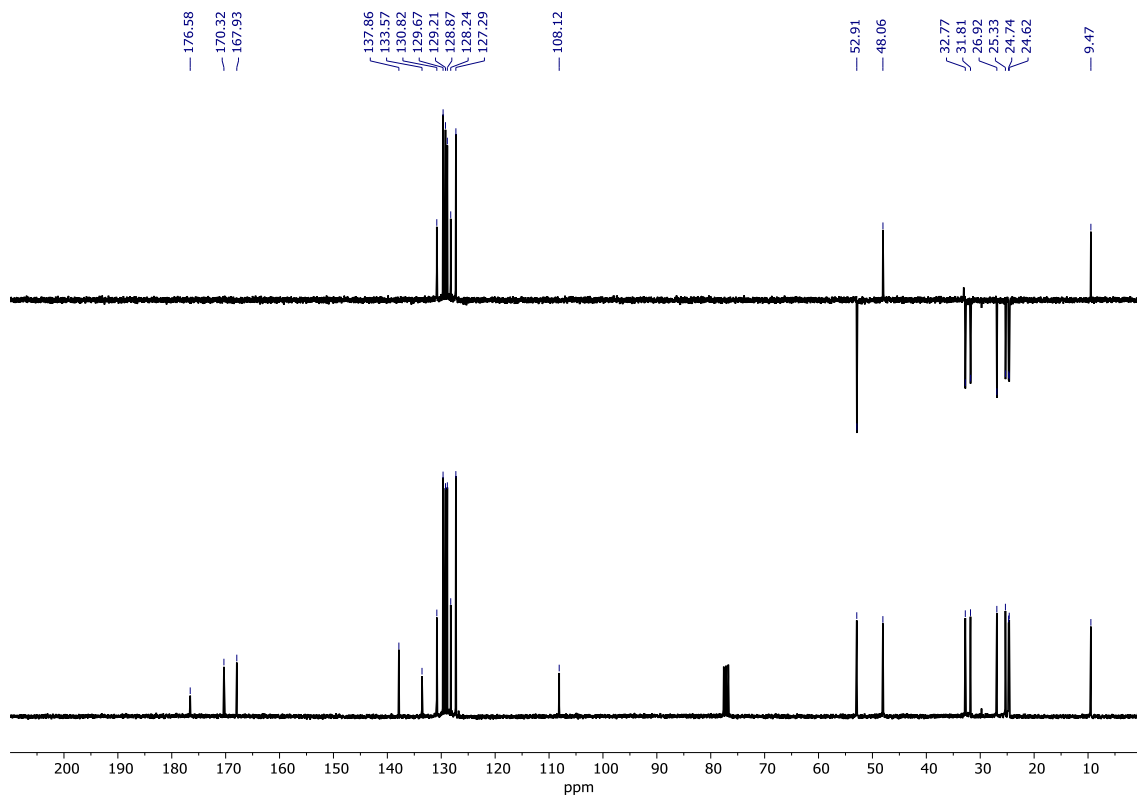

**Figure 5.** <sup>13</sup>C and DEPT-135 NMR spectra of **6** (75 MHz, CDCl<sub>3</sub>).

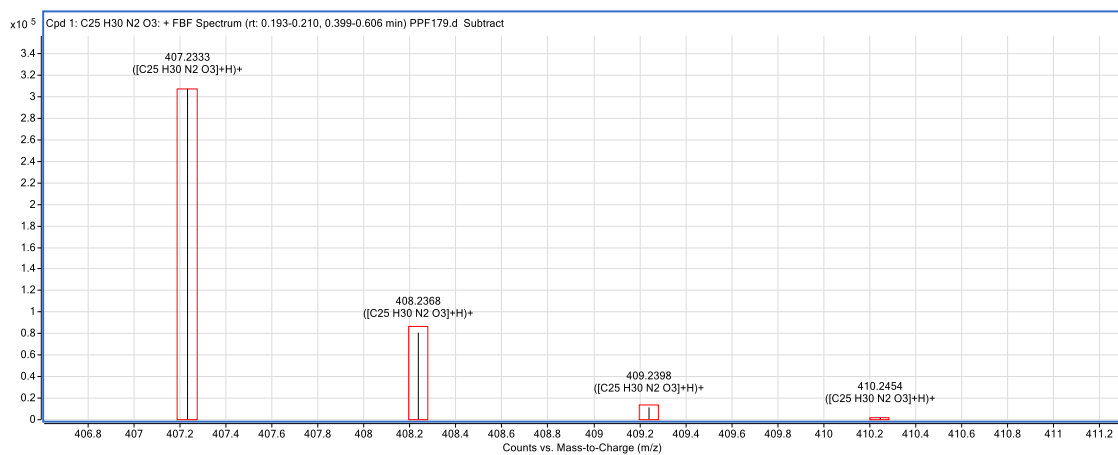

Figure 6. High-resolution mass spectrum of **6**.

**1-(Cyclohexylamino)-1,3-dioxo-3-phenylpropan-2-yl 3-bromopropanoate (7a)**

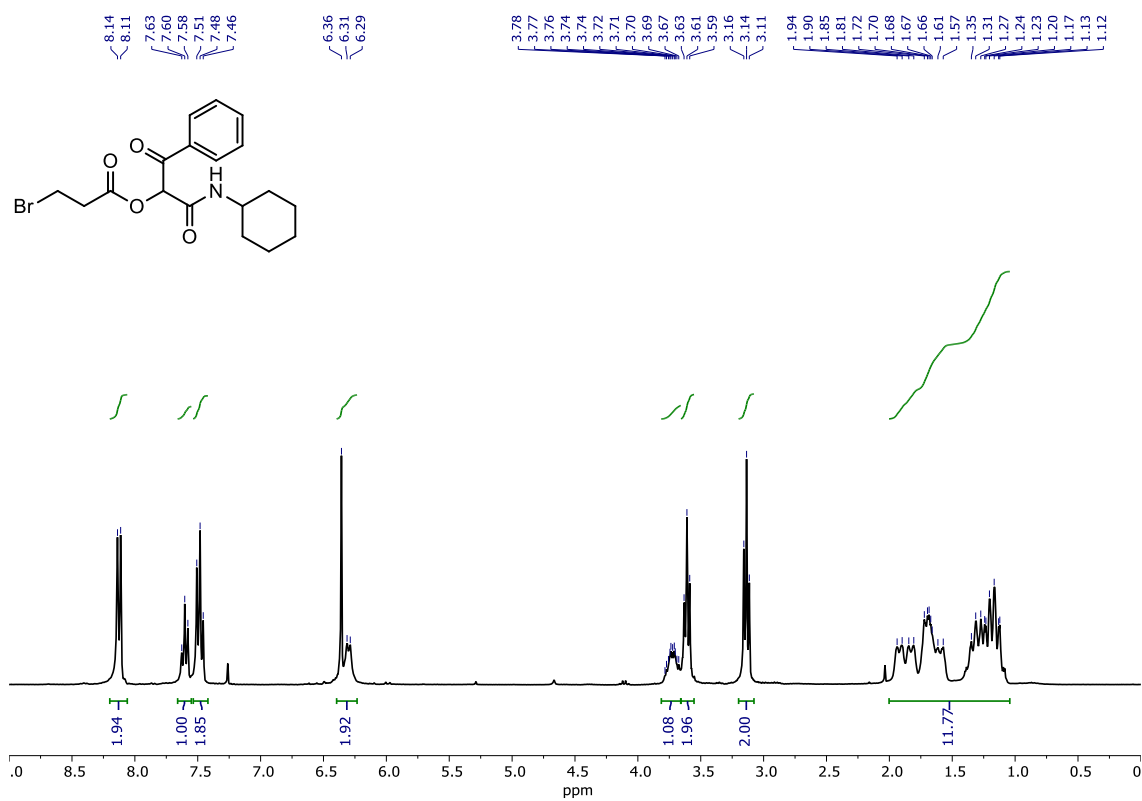

Figure 7. <sup>1</sup>H NMR spectrum of **7a** (300 MHz, CDCl<sub>3</sub>).

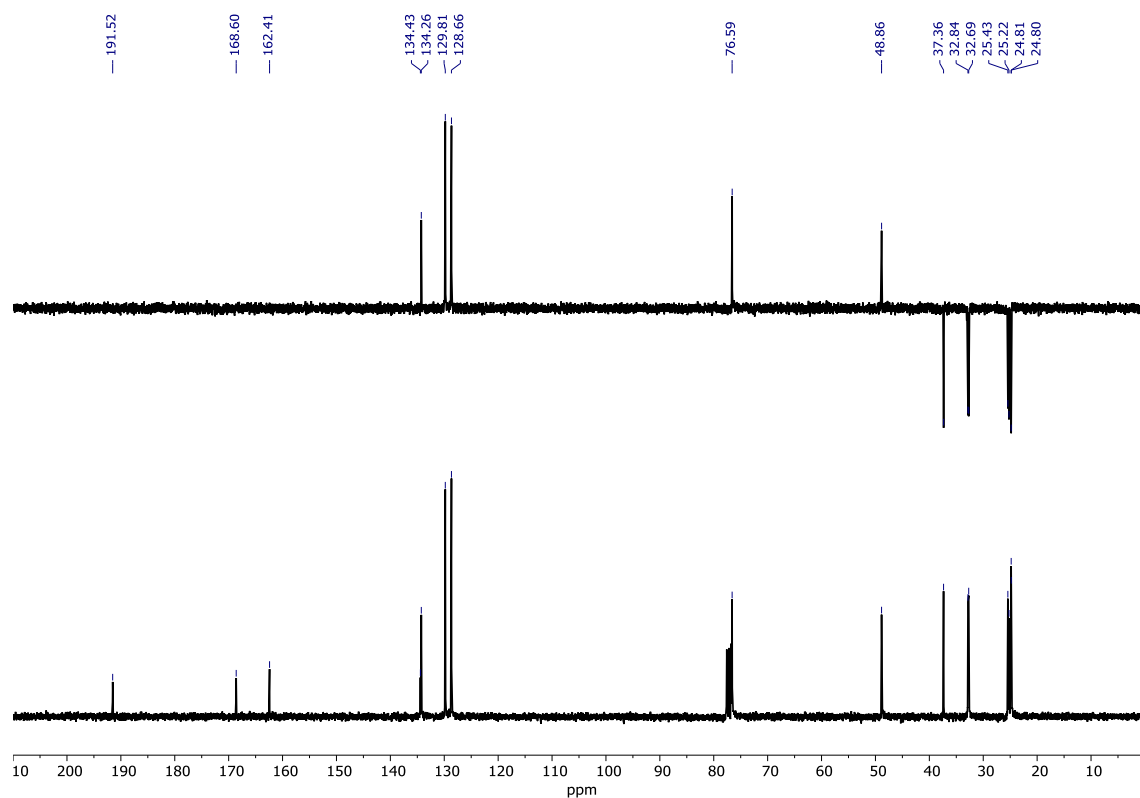

Figure 8.  $^{13}\text{C}$  and DEPT-135 NMR spectra of **7a** (75 MHz,  $\text{CDCl}_3$ ).

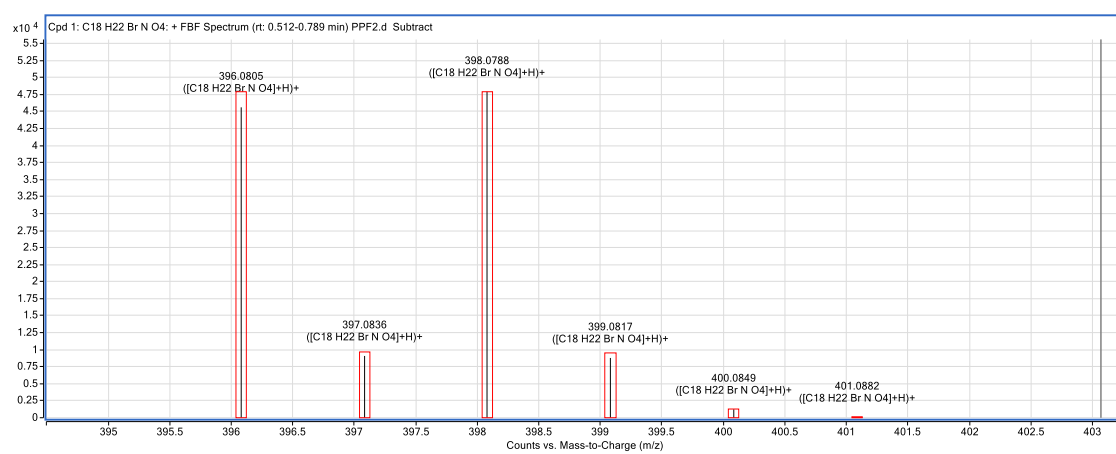

Figure 9. High-resolution mass spectrum of **7a**.

**1-(Butylamino)-1,3-dioxo-3-phenylpropan-2-yl 3-bromopropanoate (7b)**

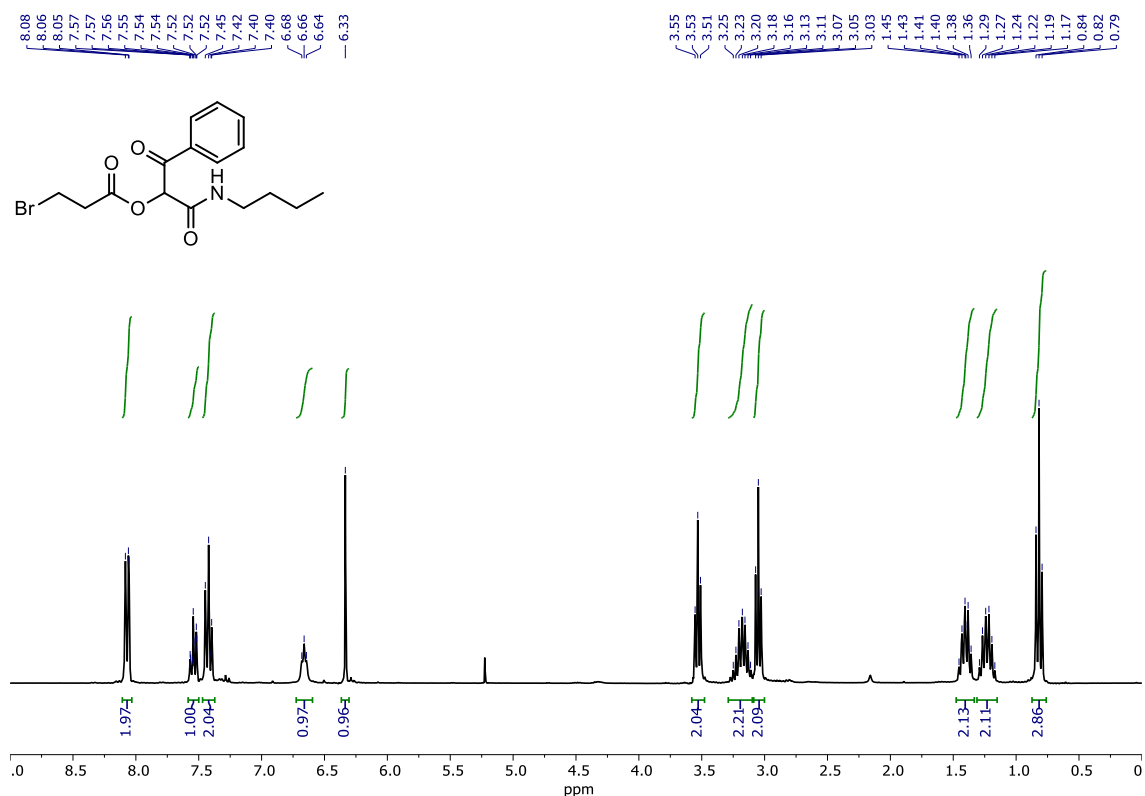

Figure 10. <sup>1</sup>H NMR spectrum of **7b** (300 MHz, CDCl<sub>3</sub>).

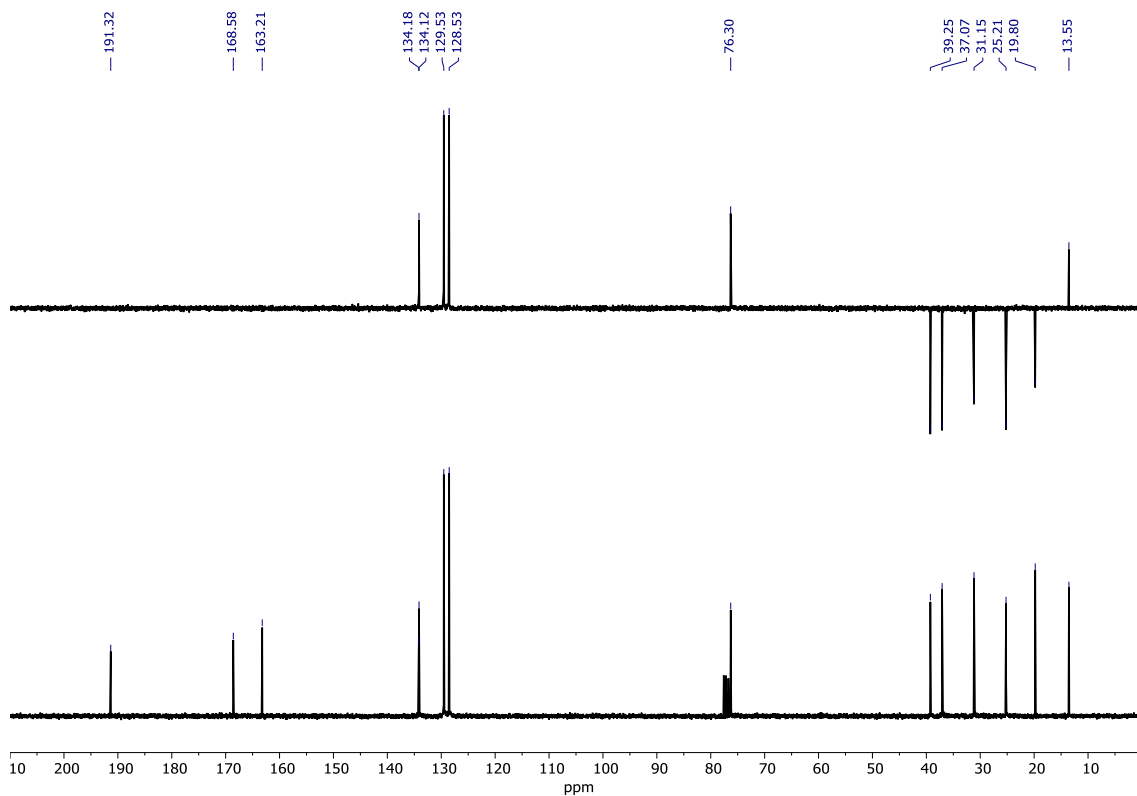

Figure 11. <sup>13</sup>C and DEPT-135 NMR spectra of **7b** (75 MHz, CDCl<sub>3</sub>).

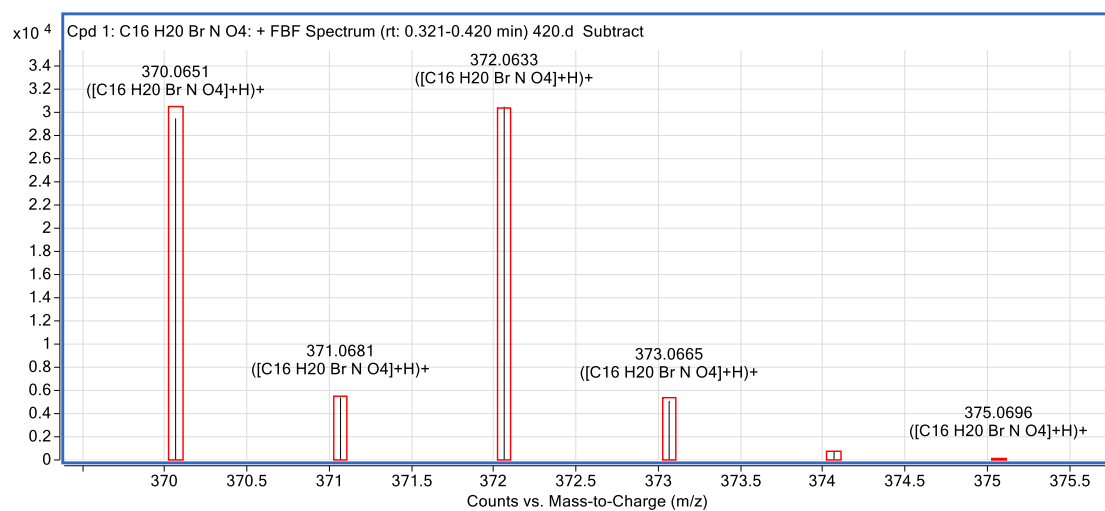

Figure 12. High-resolution mass spectrum of **7b**.

**1-(*tert*-Butylamino)-1,3-dioxo-3-phenylpropan-2-yl 3-bromopropanoate (7c)**

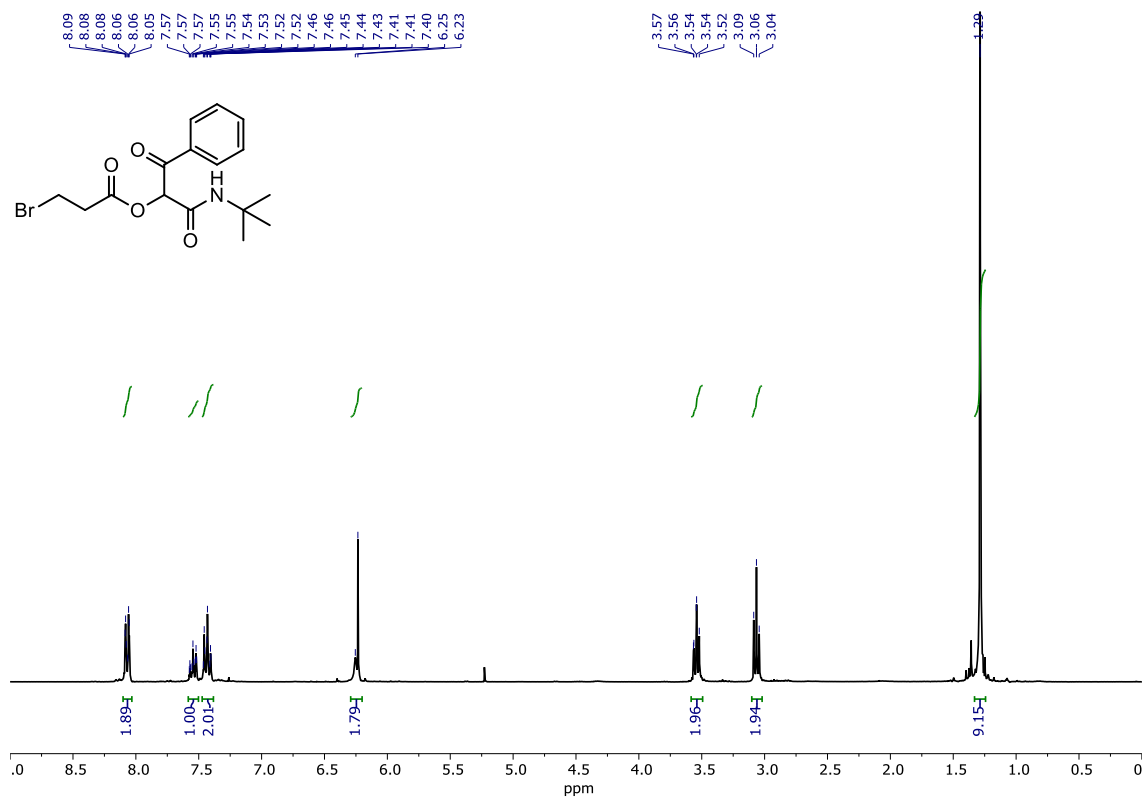

Figure 13. <sup>1</sup>H NMR spectrum of **7c** (300 MHz, CDCl<sub>3</sub>).

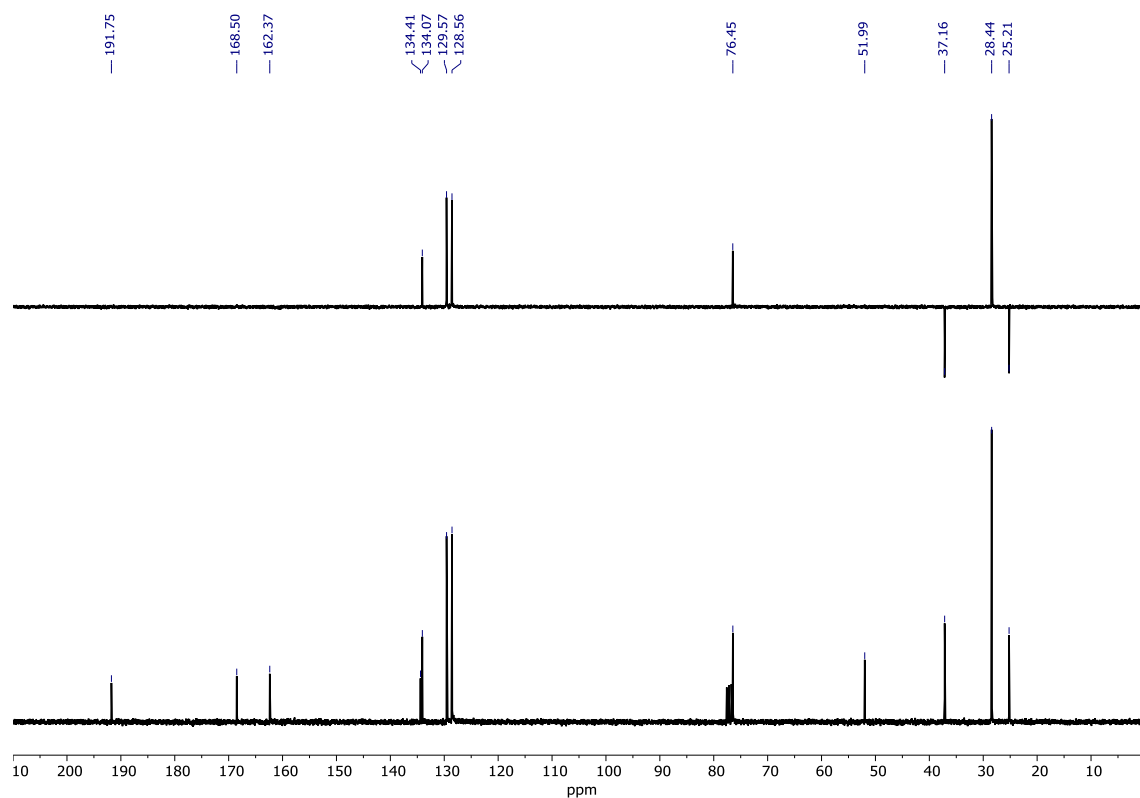

Figure 14.  $^{13}\text{C}$  and DEPT-135 NMR spectra of **7c** (75 MHz,  $\text{CDCl}_3$ ).

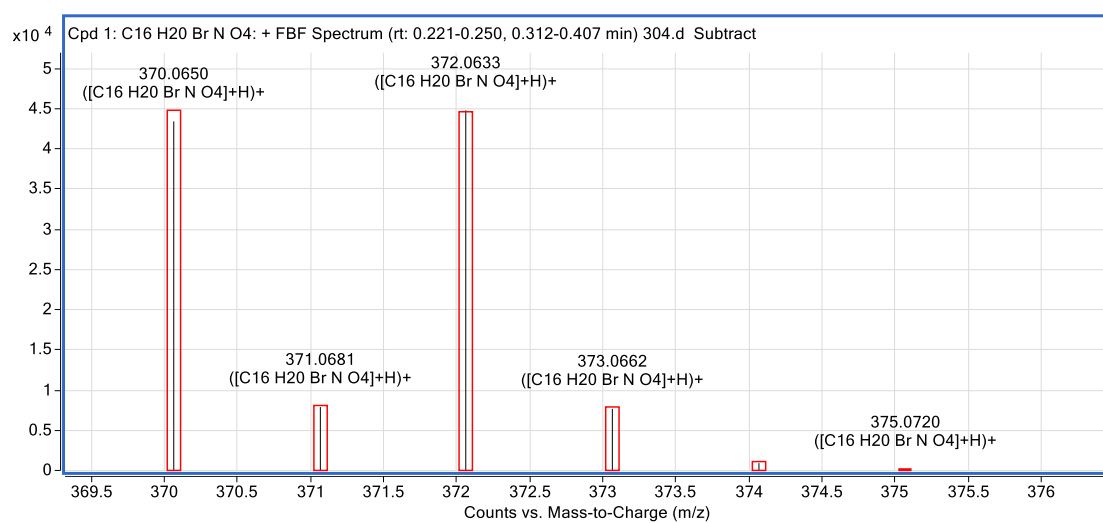

Figure 15. High-resolution mass spectrum of **7c**.



**1-(Cyclohexylamino)-3-(4-fluorophenyl)-1,3-dioxopropan-2-yl 3-bromopropanoate (7d)**

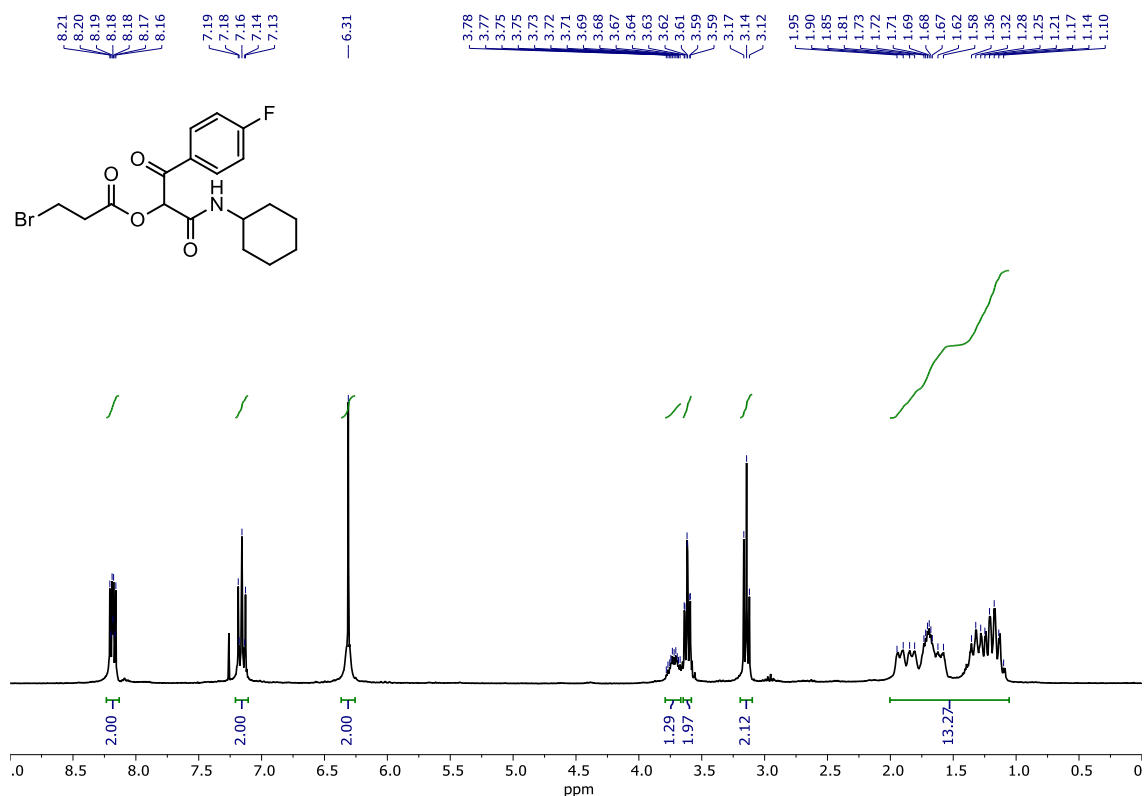

Figure 16. <sup>1</sup>H NMR spectrum of **7d** (300 MHz, CDCl<sub>3</sub>).

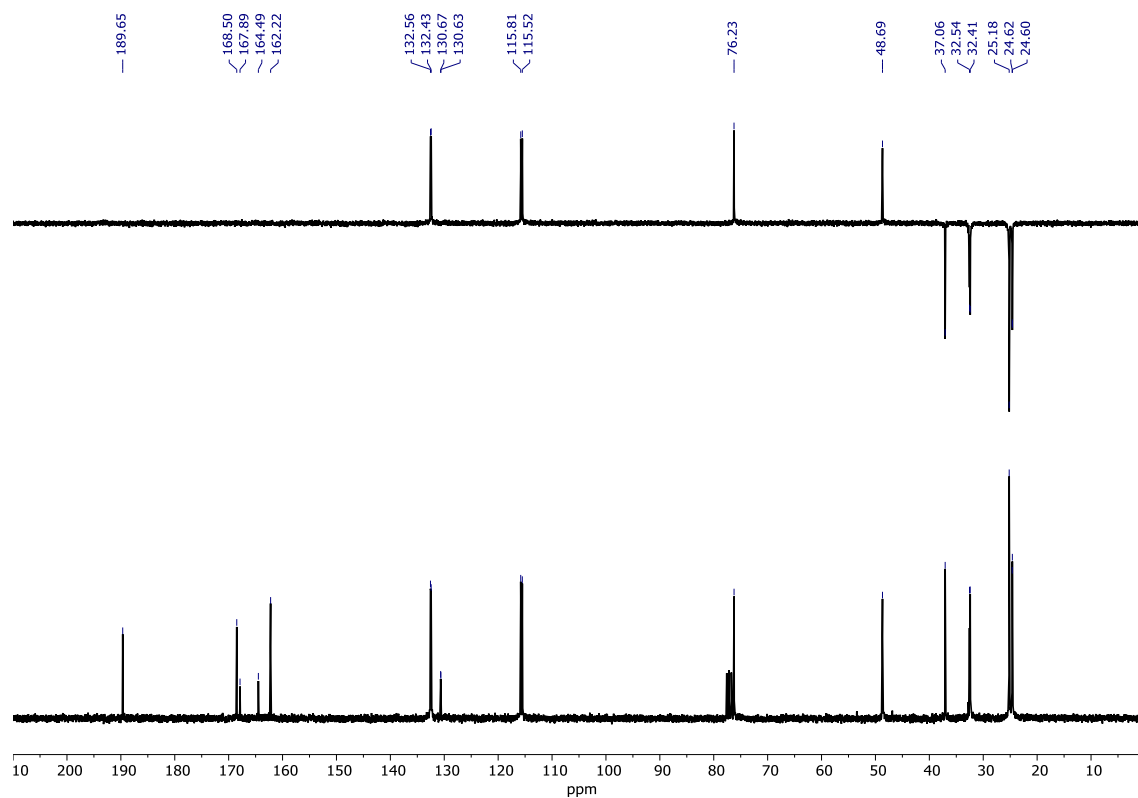

Figure 17. <sup>13</sup>C and DEPT-135 NMR spectra of **7d** (75 MHz, CDCl<sub>3</sub>).

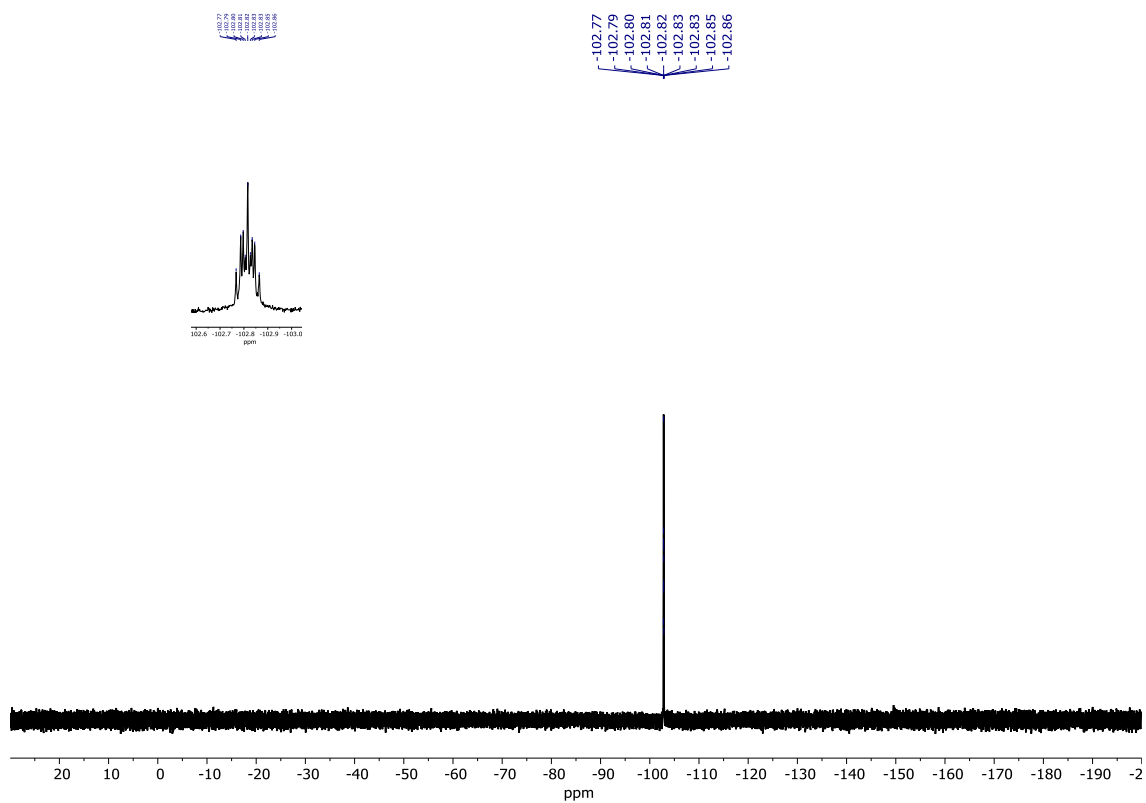

**Figure 18.**  $^{19}\text{F}$  NMR spectrum of **7d** (300 MHz,  $\text{CDCl}_3$ ).

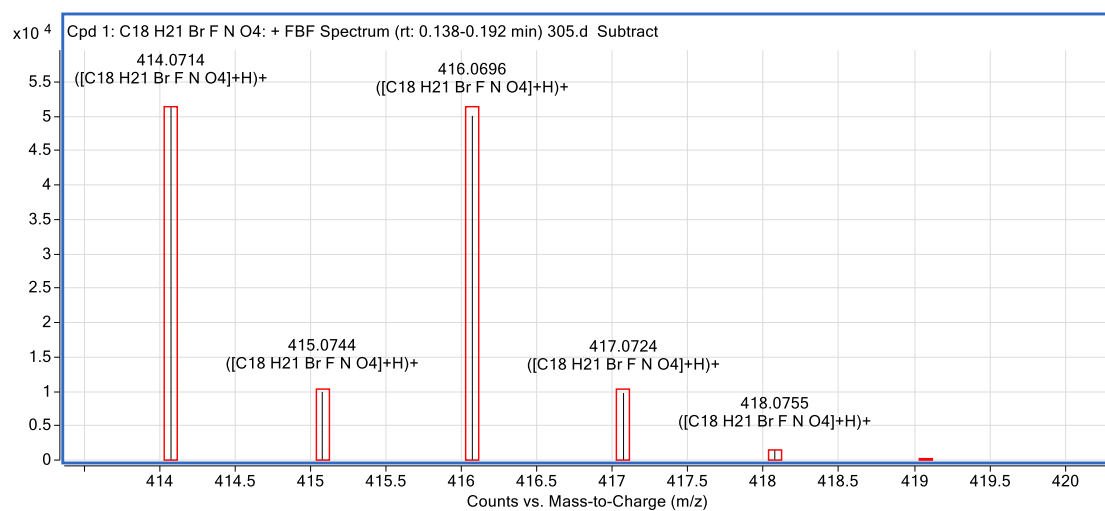

**Figure 19.** High-resolution mass spectrum of **7d**.

**2-Benzoyl-1-benzyl-N-cyclohexyl-5-oxopyrrolidine-2-carboxamide (9)**

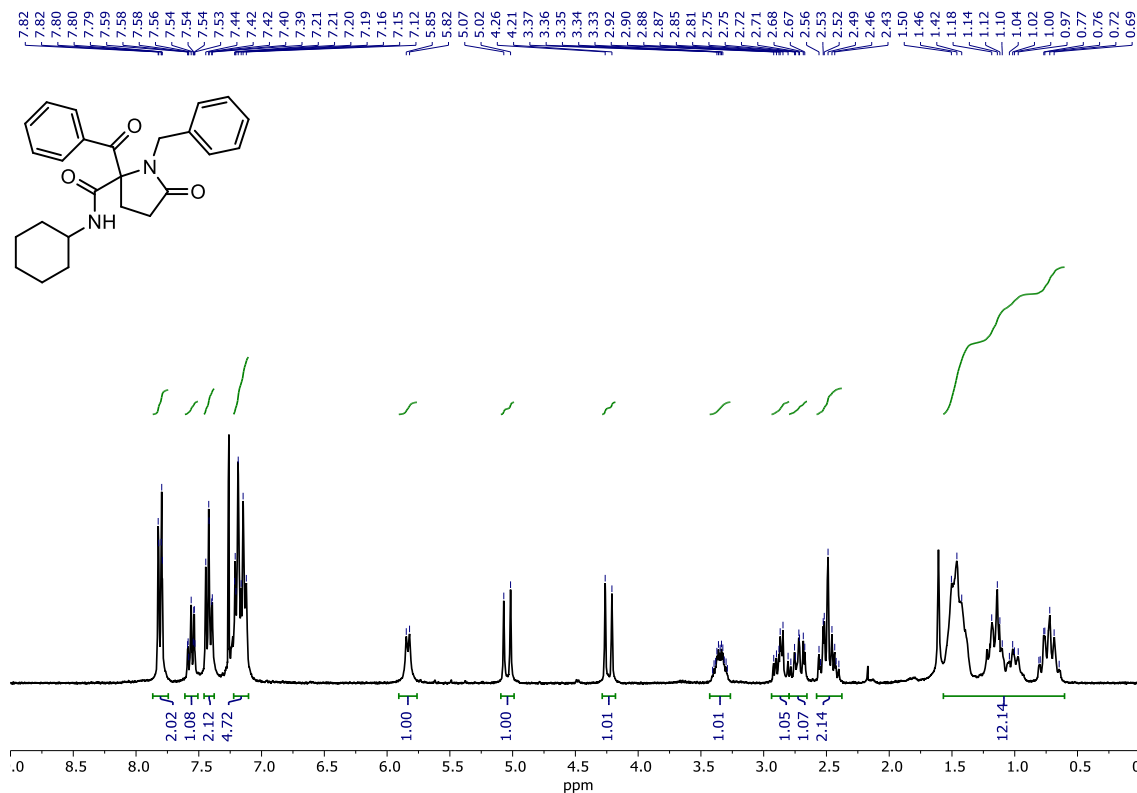

Figure 20. <sup>1</sup>H NMR spectrum of 9 (300 MHz, CDCl<sub>3</sub>).

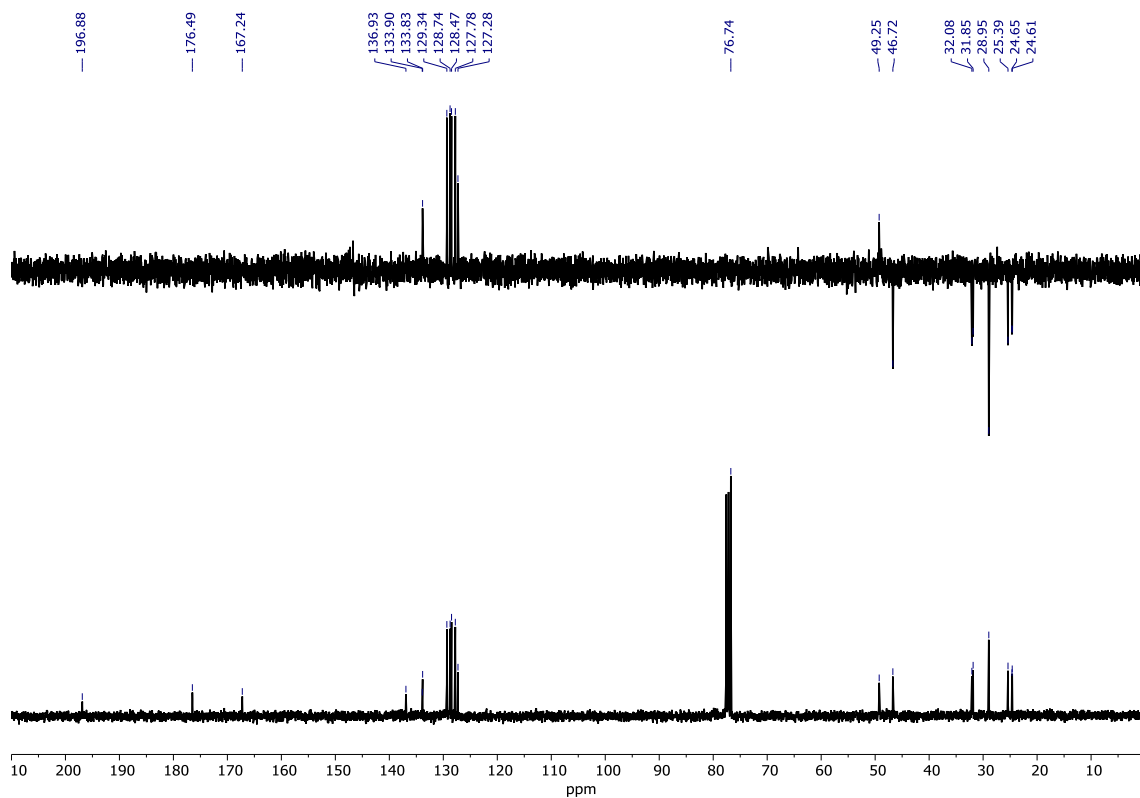

Figure 21. <sup>13</sup>C and DEPT-135 NMR spectra of 9 (75 MHz, CDCl<sub>3</sub>).

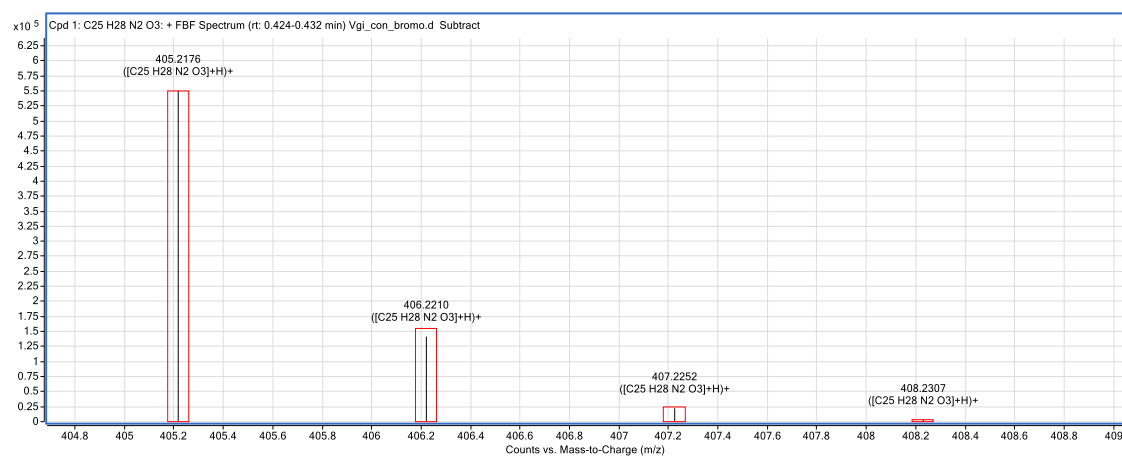

Figure 22. High-resolution mass spectrum of **9**.

**1-(Cyclohexylamino)-1,3-dioxo-3-phenylpropan-2-yl acrylate (10)**

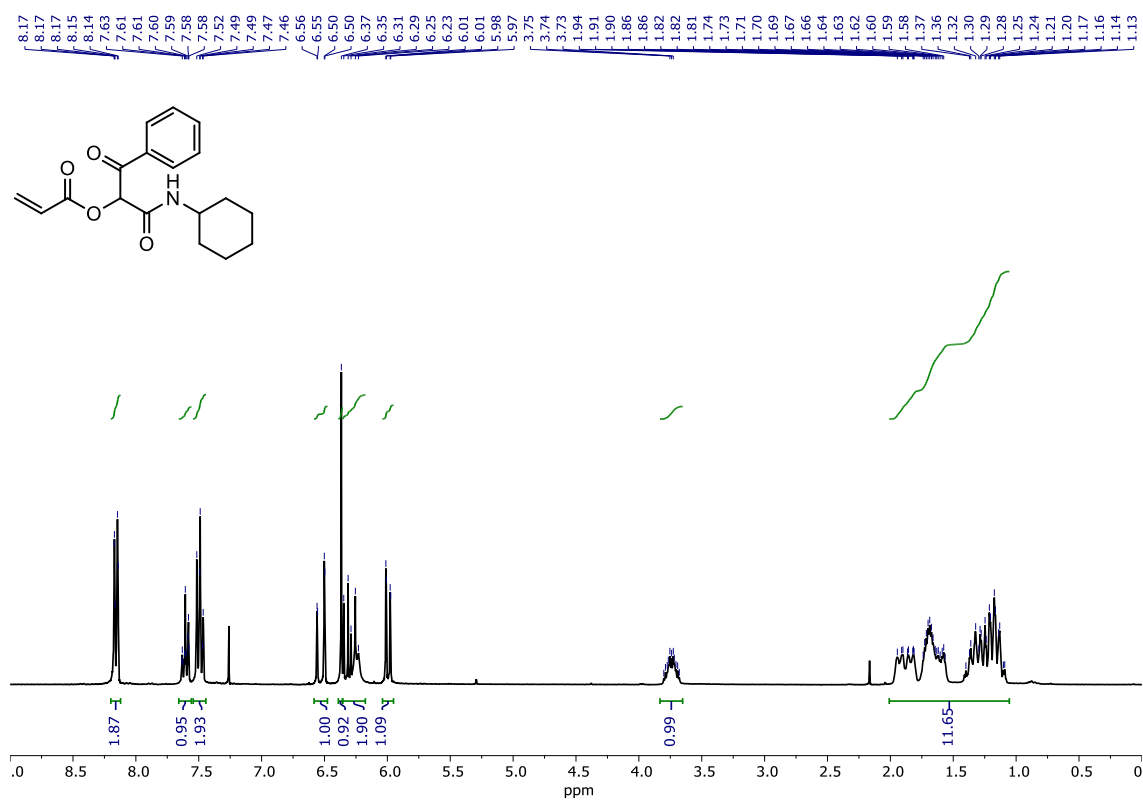

Figure 23. <sup>1</sup>H NMR spectrum of **10** (300 MHz, CDCl<sub>3</sub>).

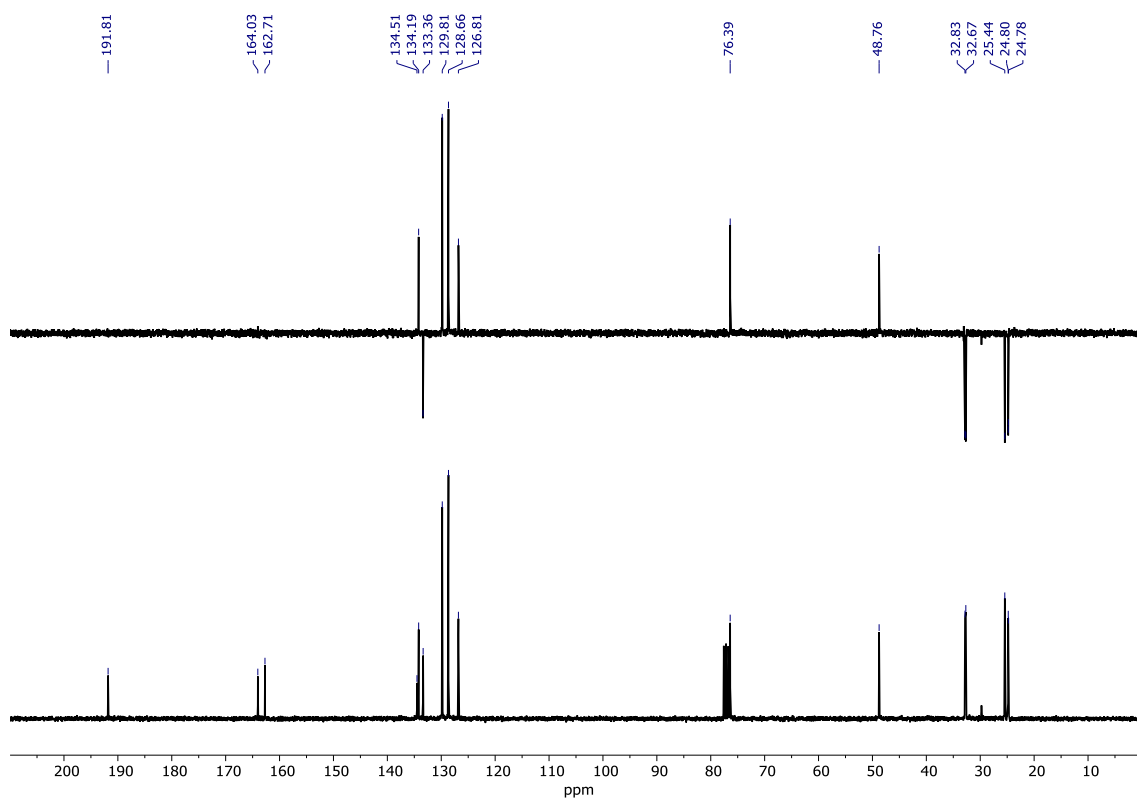

Figure 24.  $^{13}\text{C}$  and DEPT-135 NMR spectra of **10** (75 MHz,  $\text{CDCl}_3$ ).

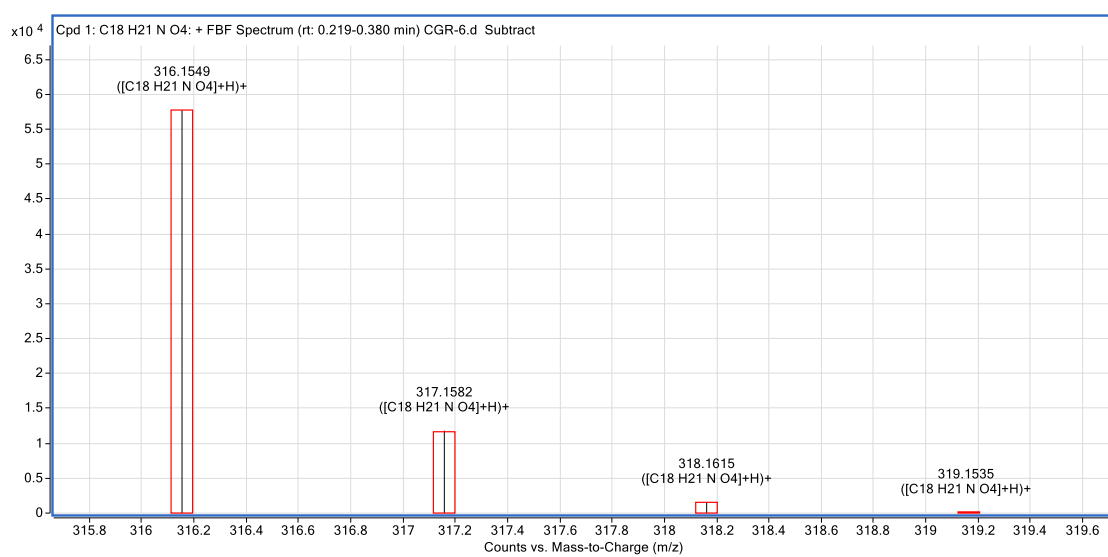

Figure 25. High-resolution mass spectrum of **10**.

**2-Benzoyl-N-cyclohexyl-5-oxotetrahydrofuran-2-carboxamide (11a)**

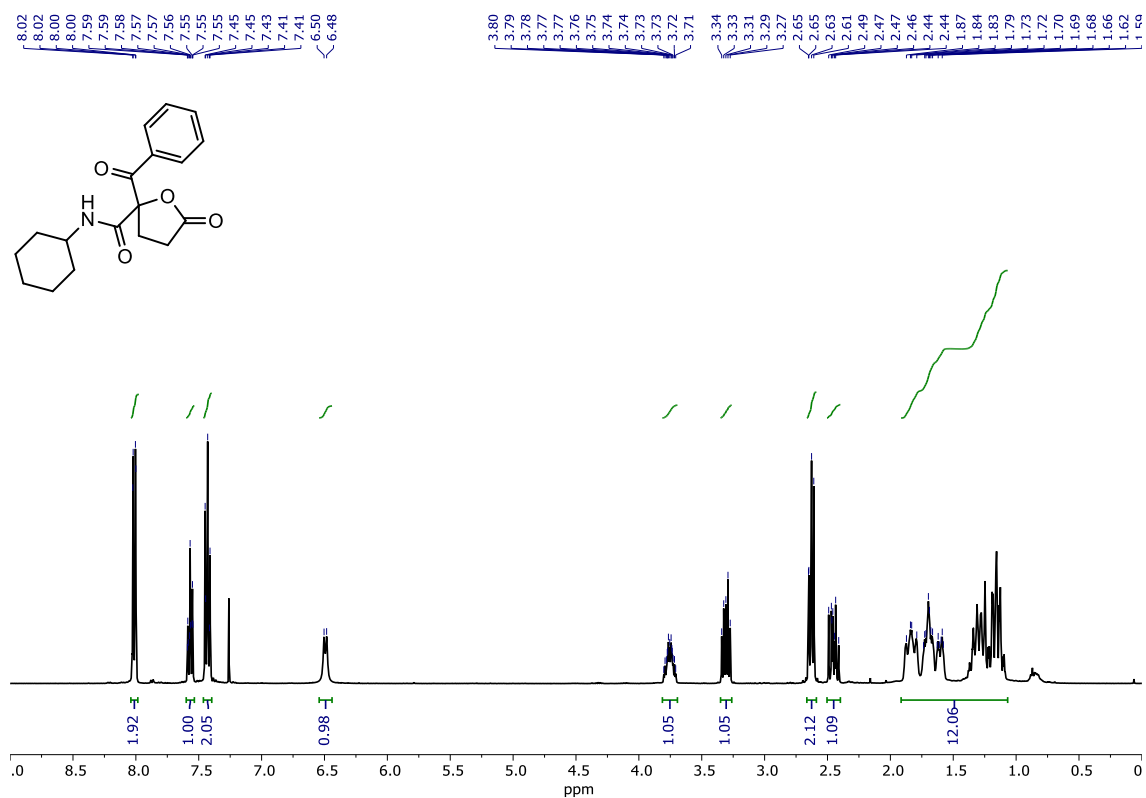

Figure 26. <sup>1</sup>H NMR spectrum of 11a (400 MHz, CDCl<sub>3</sub>).

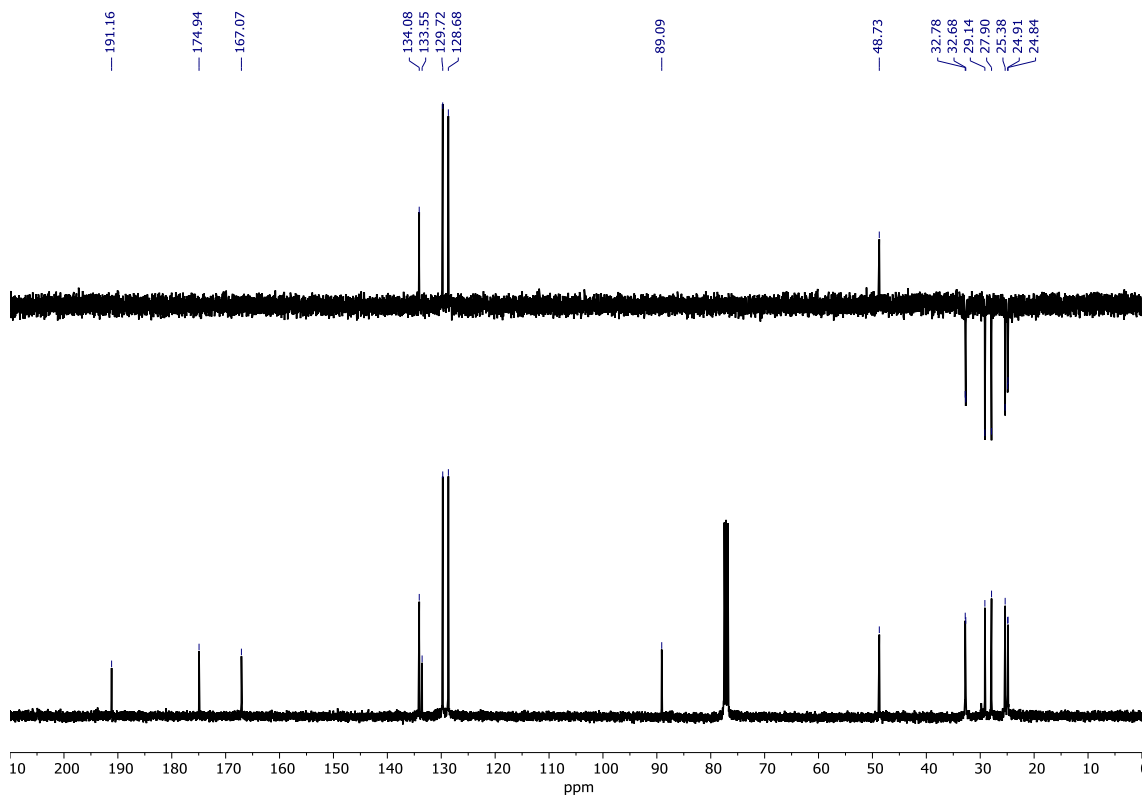

Figure 27. <sup>13</sup>C and DEPT-135 NMR spectra of 11a (100 MHz, CDCl<sub>3</sub>).

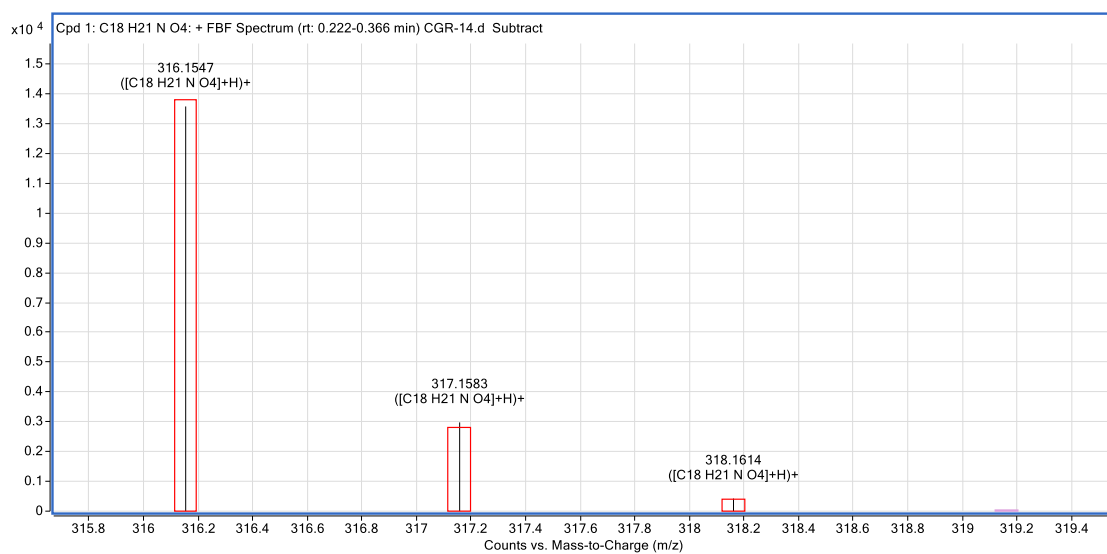

Figure 28. High-resolution mass spectrum of 11a.

**2-Benzoyl-N-butyl-5-oxotetrahydrofuran-2-carboxamide (11b)**

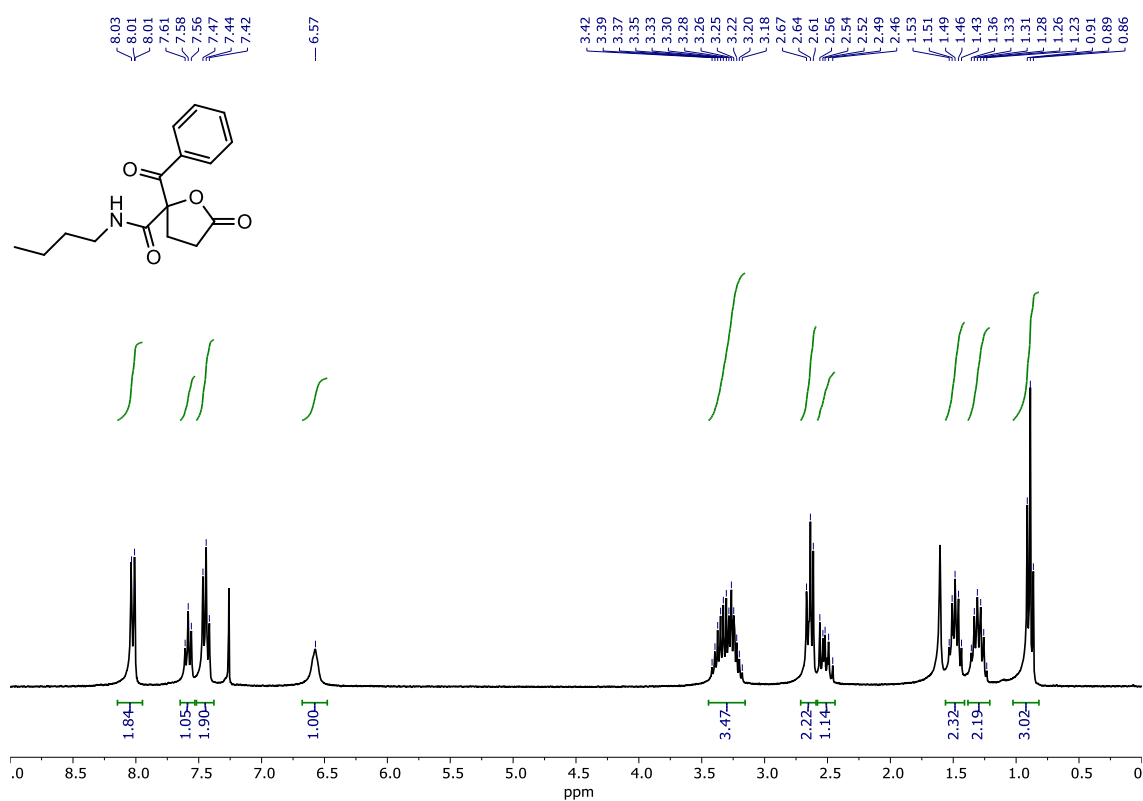

Figure 29. <sup>1</sup>H NMR spectrum of 11b (300 MHz, CDCl<sub>3</sub>).

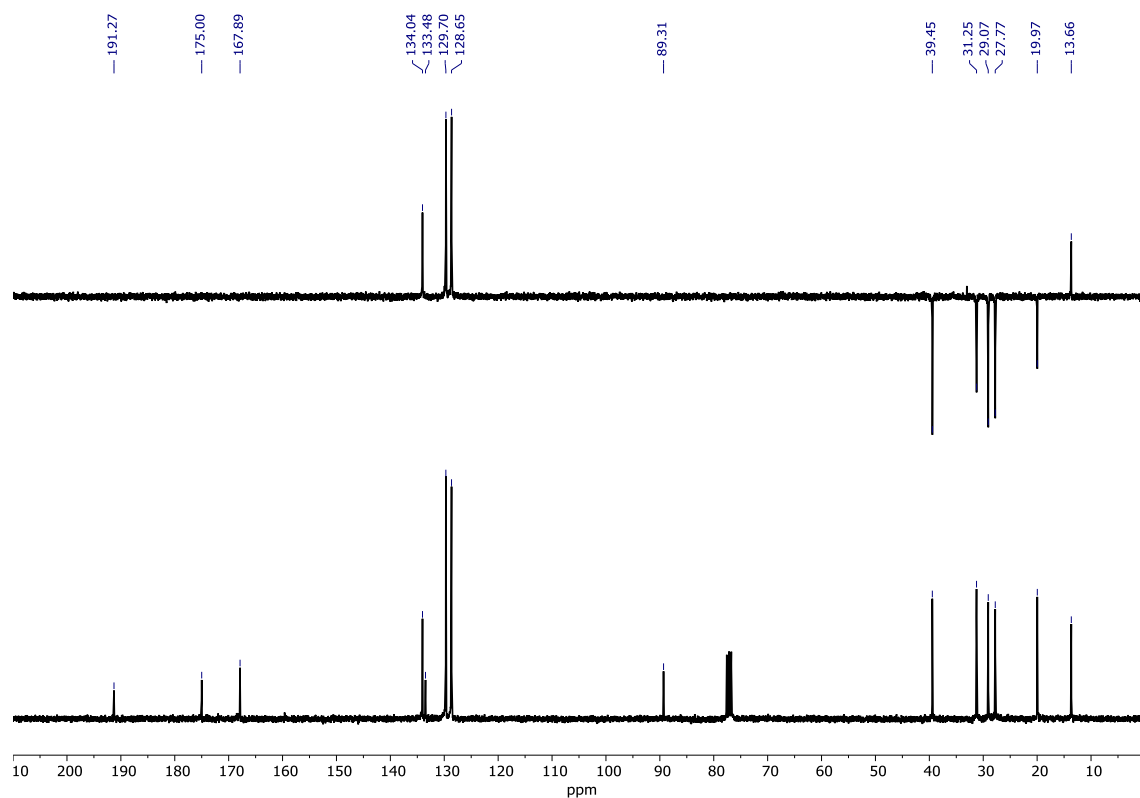

**Figure 30.**  $^{13}\text{C}$  and DEPT-135 NMR spectra of **11b** (75 MHz,  $\text{CDCl}_3$ ).

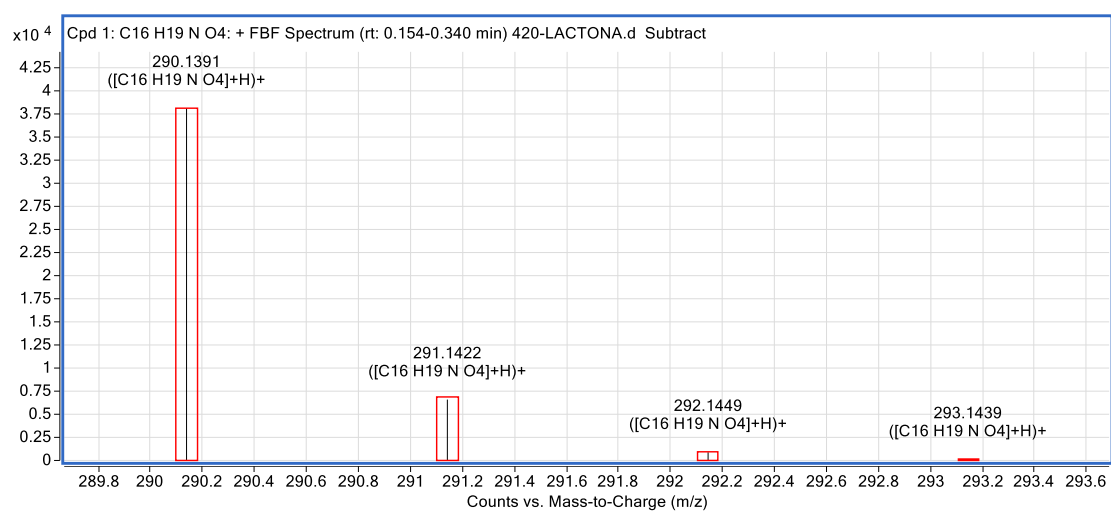

**Figure 31.** High-resolution mass spectrum of **11b**.



**2-Benzoyl-N-(tert-butyl)-5-oxotetrahydrofuran-2-carboxamide (11c)**

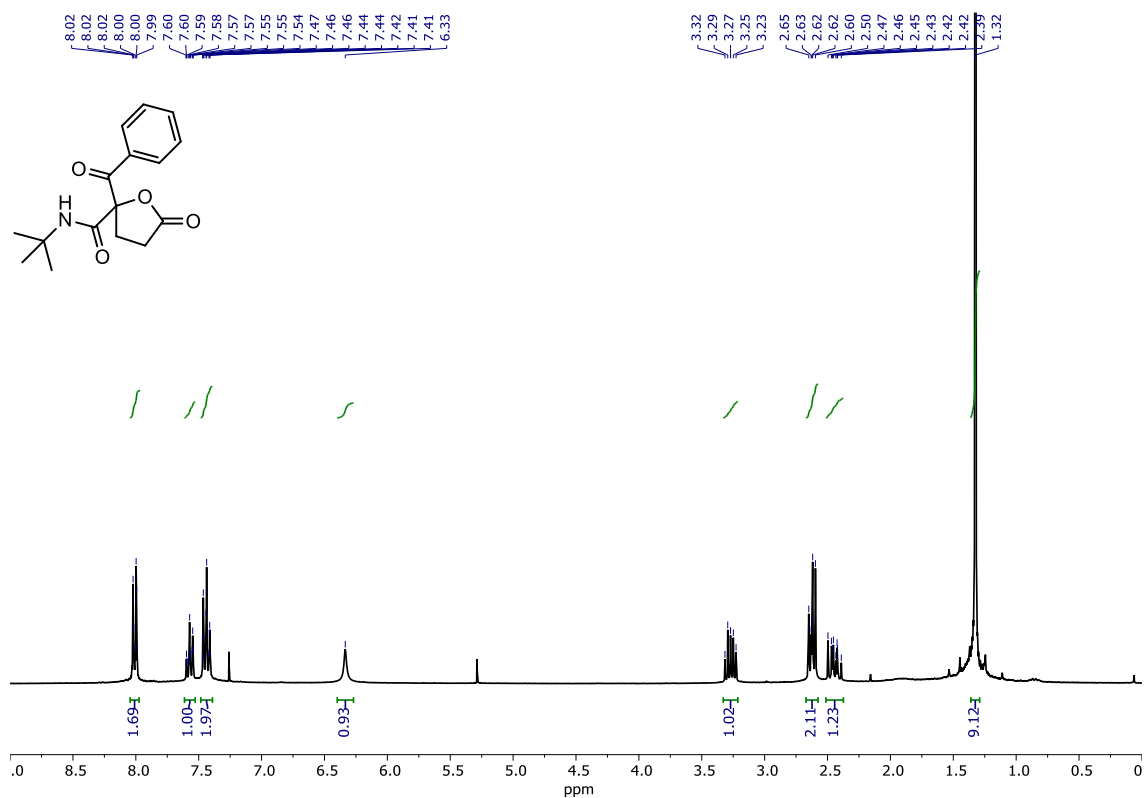

Figure 32. <sup>1</sup>H NMR spectrum of **11c** (300 MHz, CDCl<sub>3</sub>).

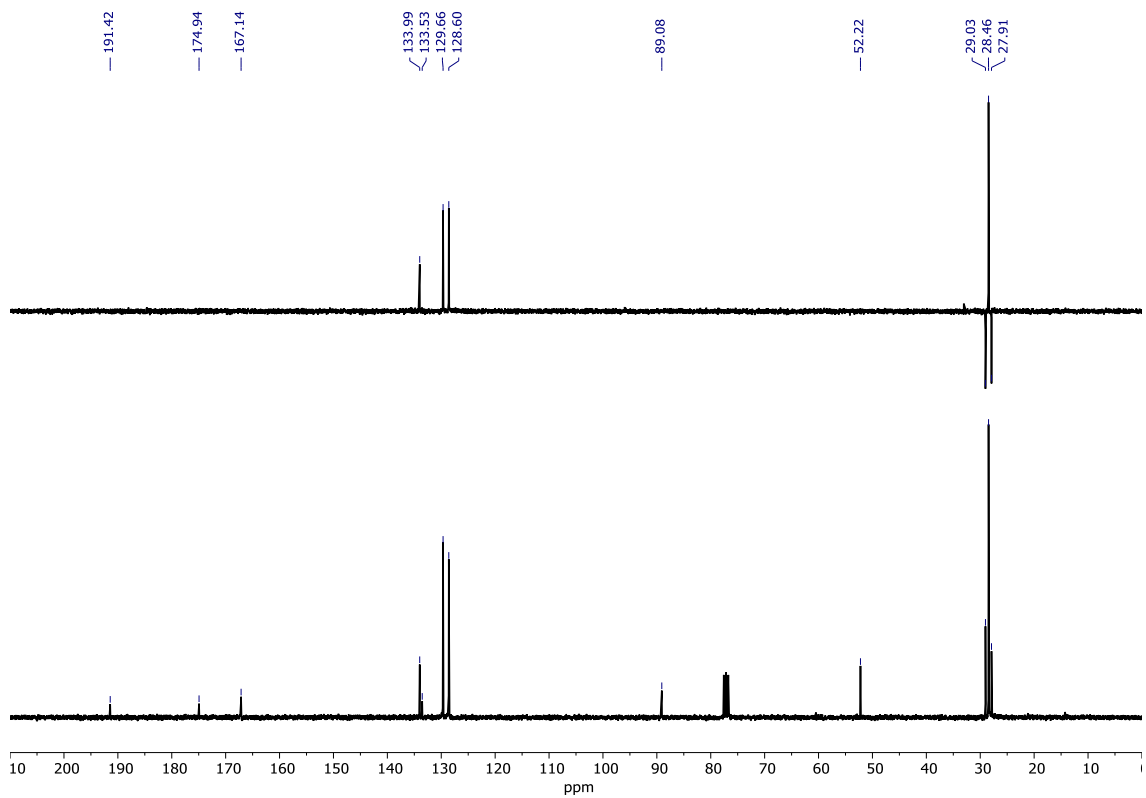

Figure 33. <sup>13</sup>C and DEPT-135 NMR spectra of **11c** (75 MHz, CDCl<sub>3</sub>).

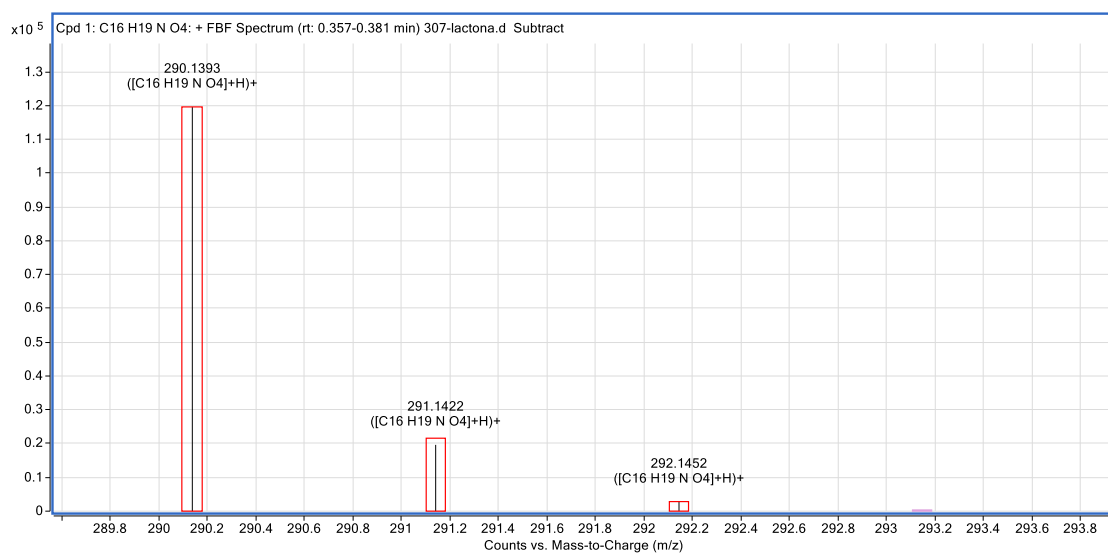

Figure 34. High-resolution mass spectrum of 11c.

**N-Cyclohexyl-2-(4-fluorobenzoyl)-5-oxotetrahydrofuran-2-carboxamide (11d)**

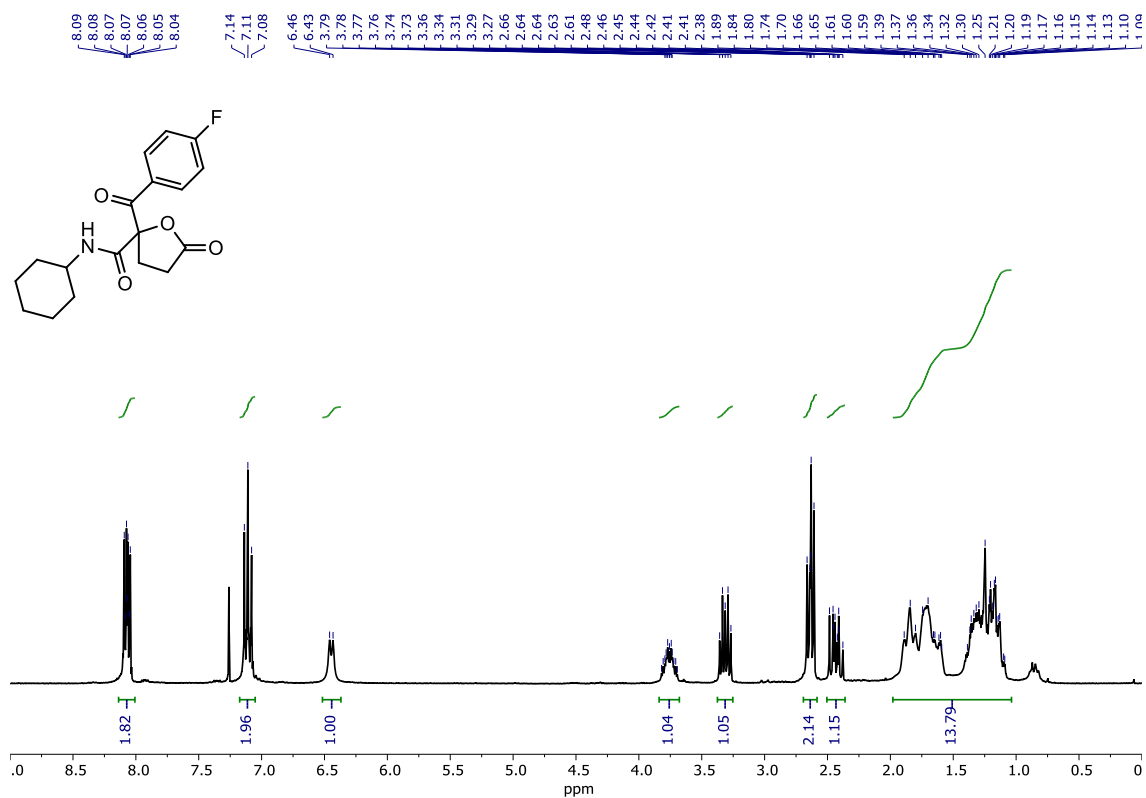

Figure 35. <sup>1</sup>H NMR spectrum of 11d (300 MHz, CDCl<sub>3</sub>).

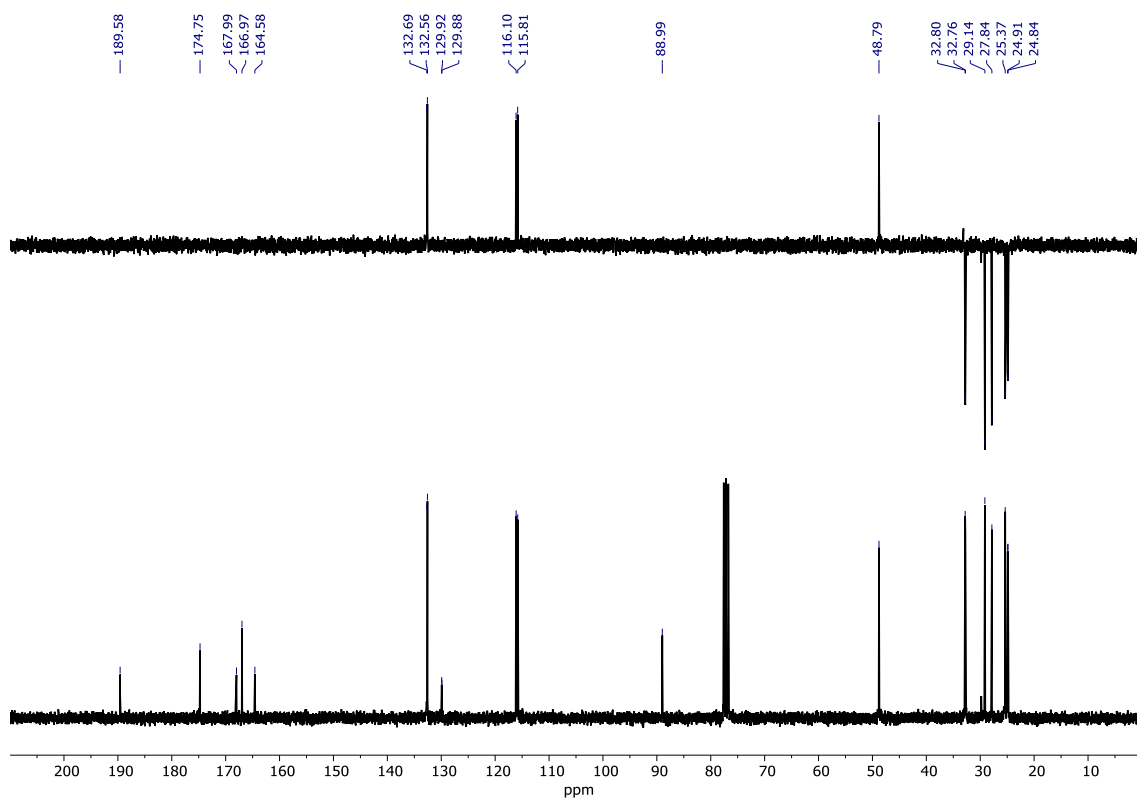

**Figure 36.**  $^{13}\text{C}$  and DEPT-135 NMR spectra of **11d** (75 MHz,  $\text{CDCl}_3$ ).

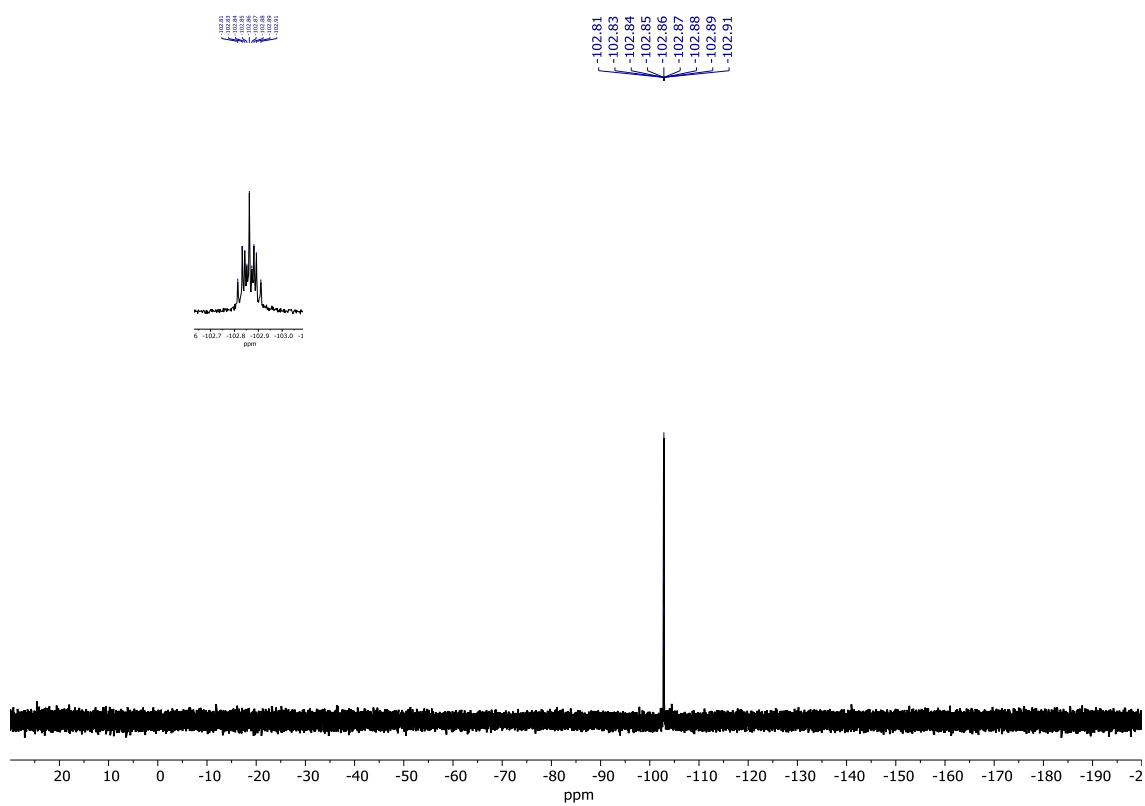

**Figure 37.**  $^{19}\text{F}$  NMR spectrum of **11d** (300 MHz,  $\text{CDCl}_3$ ).

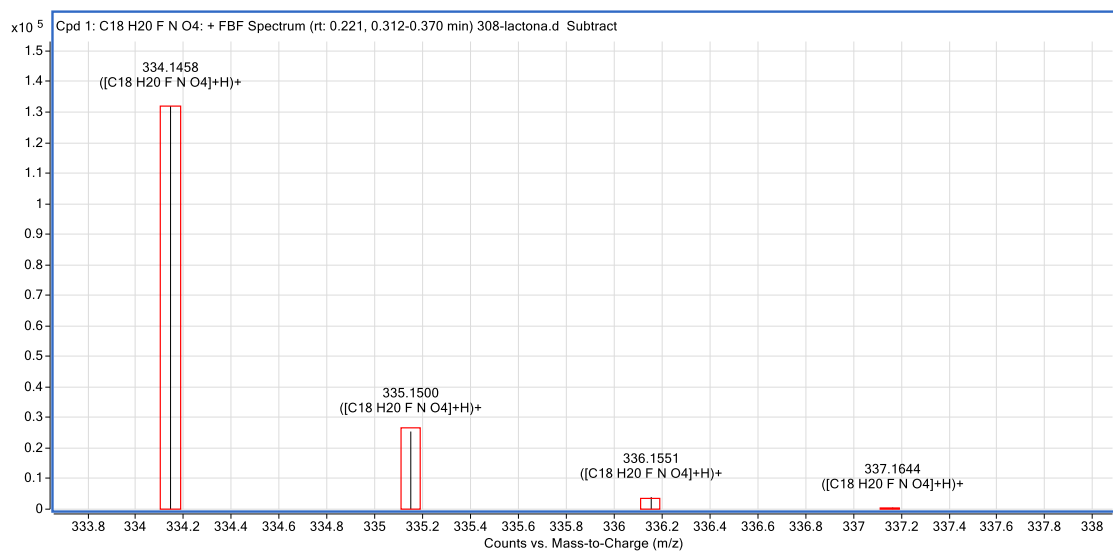

Figure 38. High-resolution mass spectrum of **11d**.

**4-Benzoyl-5-(cyclohexylamino)-4-hydroxy-5-oxopentanoic acid (12a)**

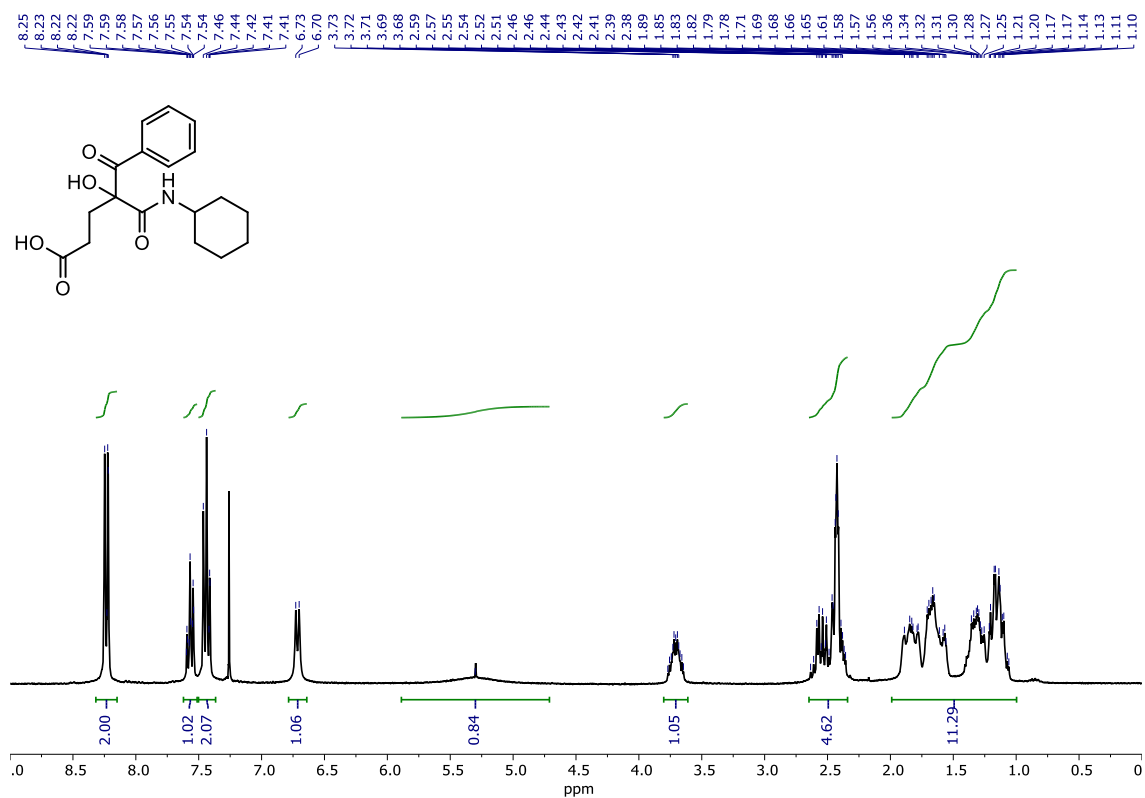

Figure 39. <sup>1</sup>H NMR spectrum of **12a** (300 MHz, CDCl<sub>3</sub>).

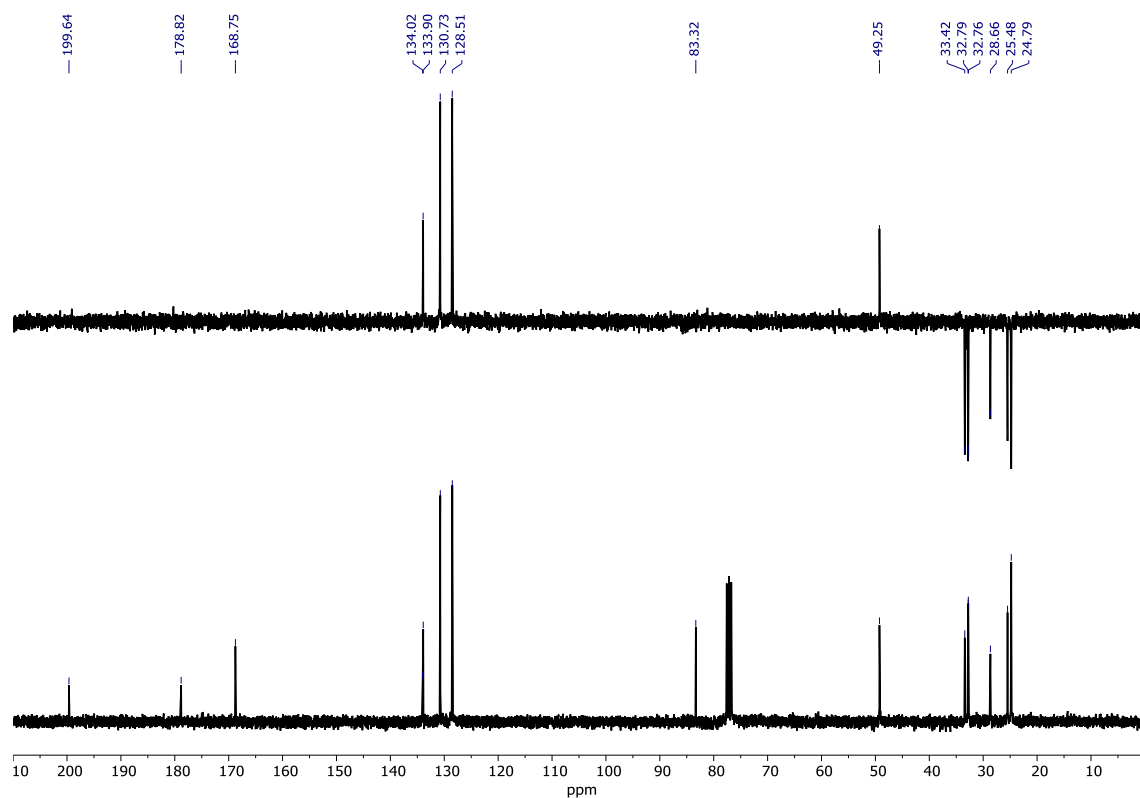

Figure 40.  $^{13}\text{C}$  and DEPT-135 NMR spectra of **12a** (75 MHz,  $\text{CDCl}_3$ ).

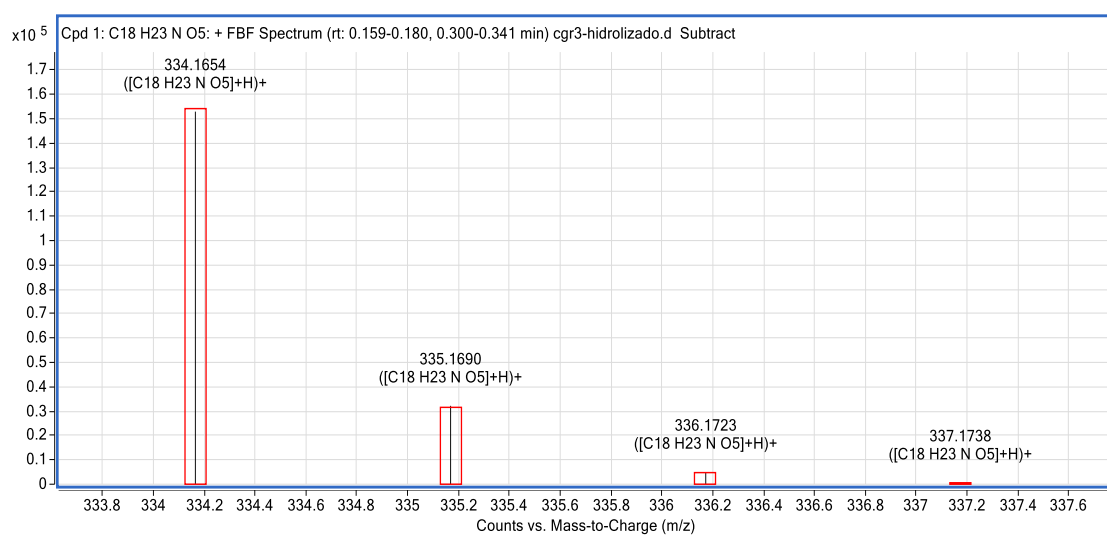

Figure 41. High-resolution mass spectrum of **12a**.

**4-Benzoyl-5-(butylamino)-4-hydroxy-5-oxopentanoic acid (12b)**

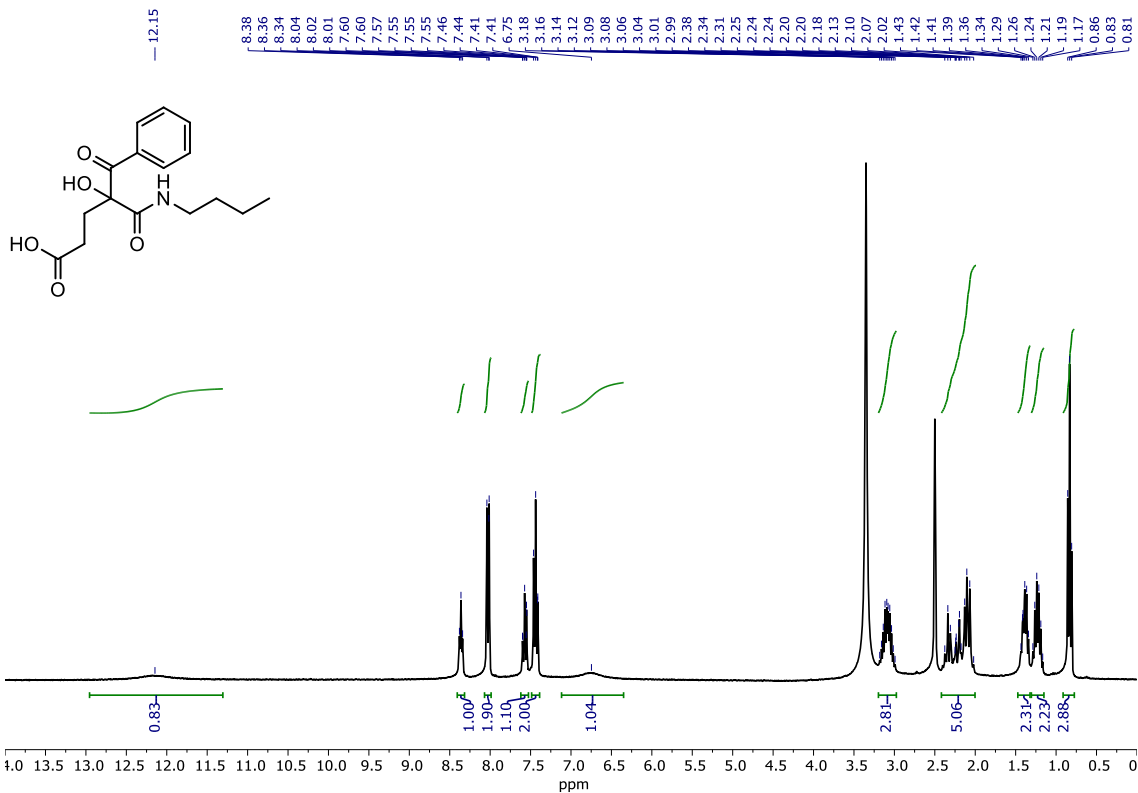

**Figure 42.**  $^1\text{H}$  NMR spectrum of **12b** (300 MHz, DMSO- $d_6$ ).

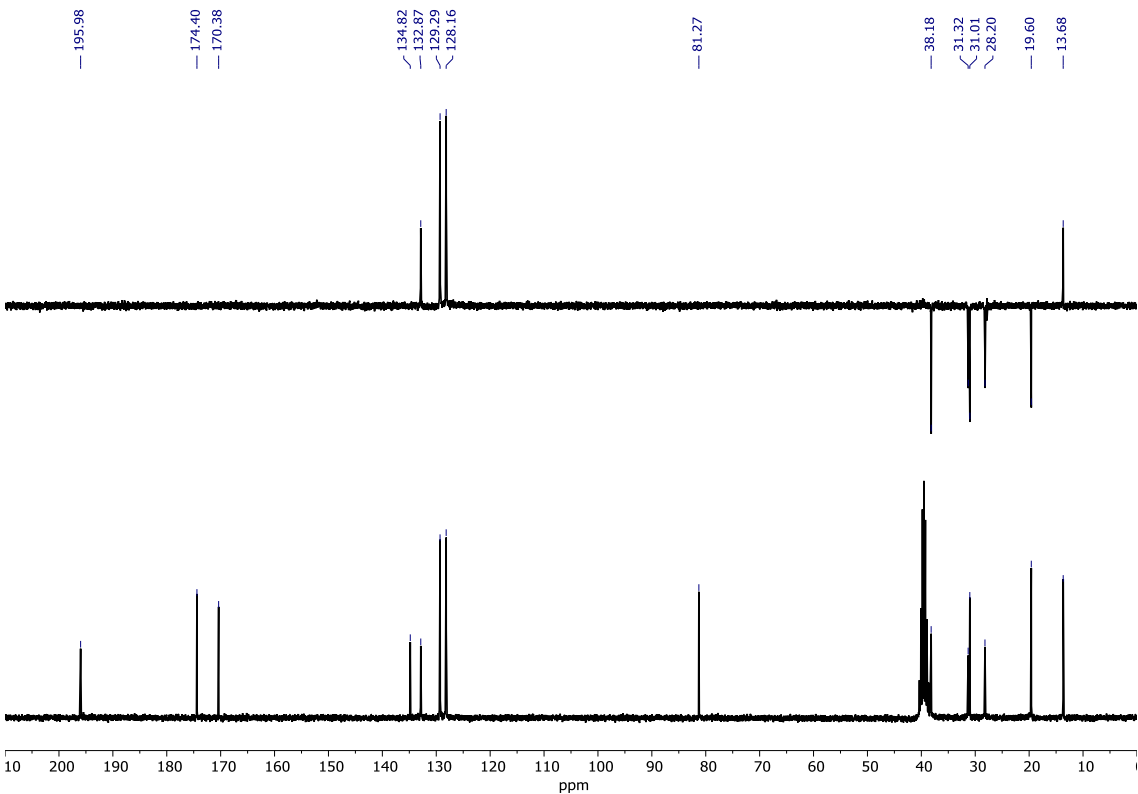

**Figure 43.**  $^{13}\text{C}$  and DEPT-135 NMR spectra of **12b** (75 MHz,  $\text{DMSO}-d_6$ ).

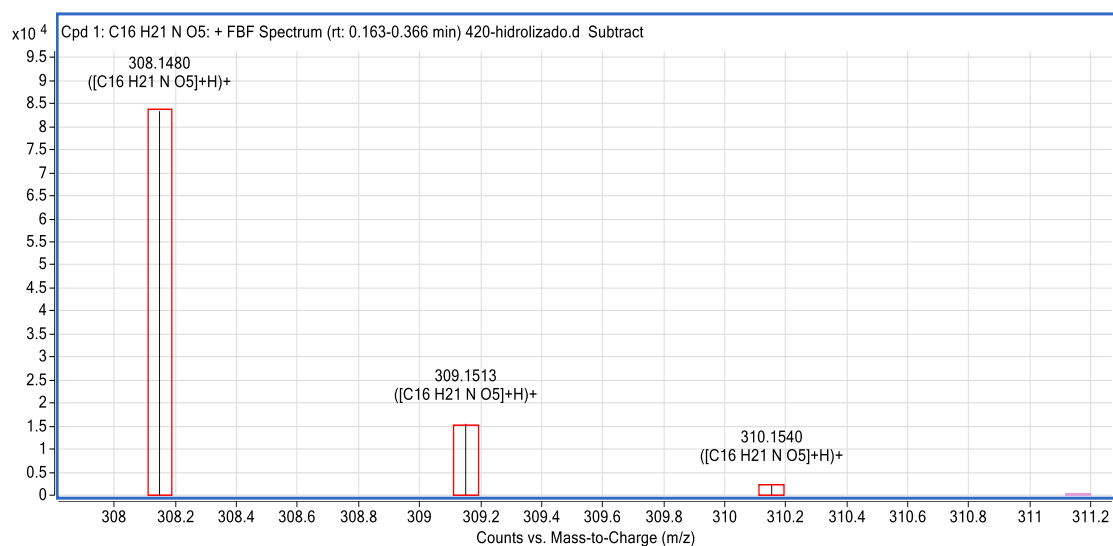

Figure 44. High-resolution mass spectrum of **12b**.

**4-Benzoyl-5-(*tert*-butylamino)-4-hydroxy-5-oxopentanoic acid (**12c**)**

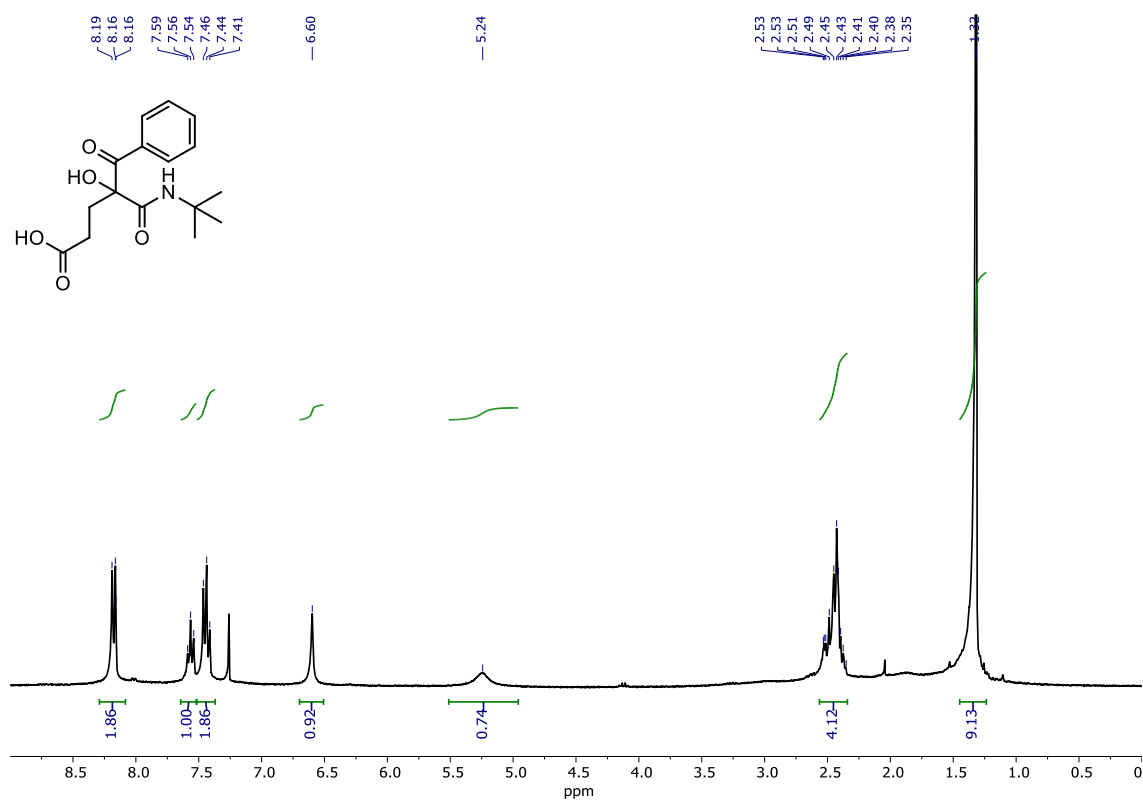

Figure 45.  $^1\text{H}$  NMR spectrum of **12c** (300 MHz,  $\text{CDCl}_3$ ).

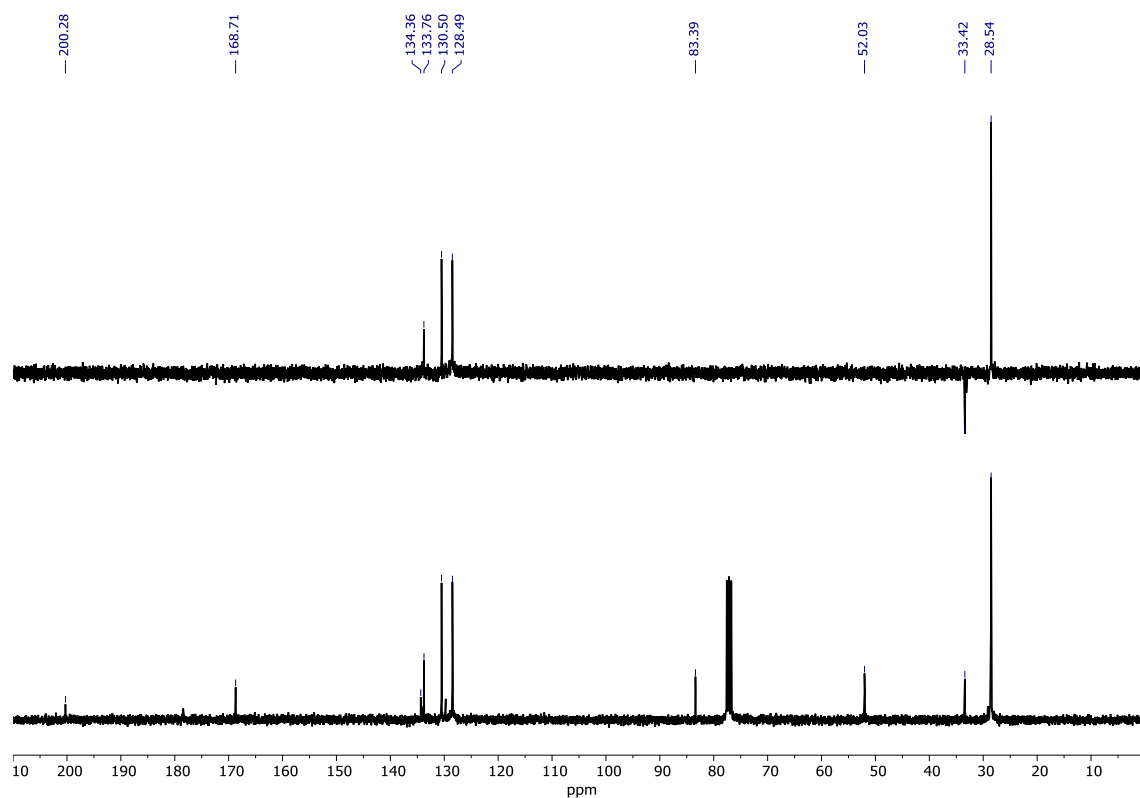

**Figure 46.**  $^{13}\text{C}$  and DEPT-135 NMR spectra of **12c** (75 MHz,  $\text{CDCl}_3$ ).

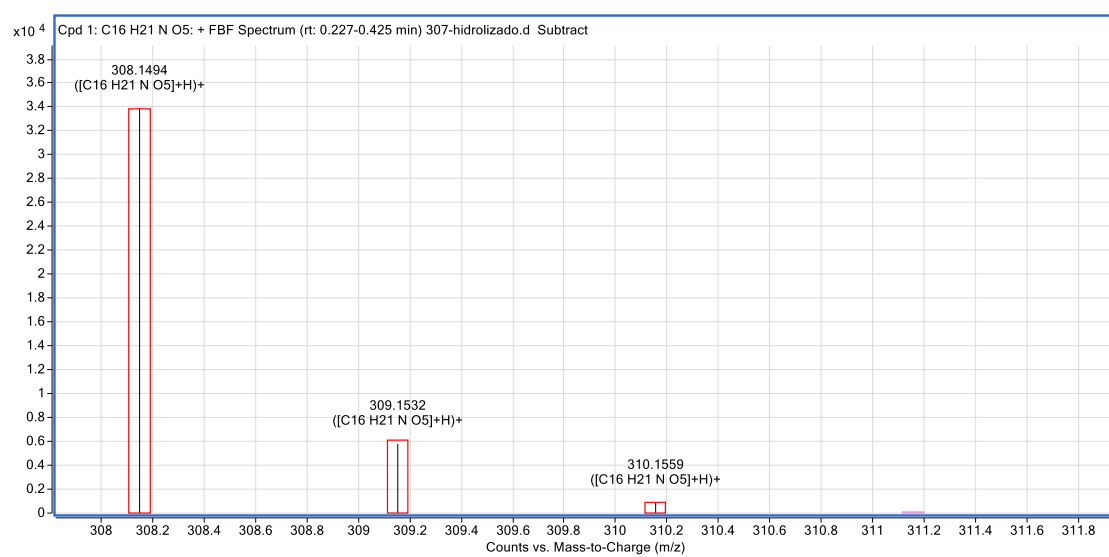

**Figure 47.** High-resolution mass spectrum of **12c**.



**5-(Cyclohexylamino)-4-(4-fluorobenzoyl)-4-hydroxy-5-oxopentanoic acid (12d)**

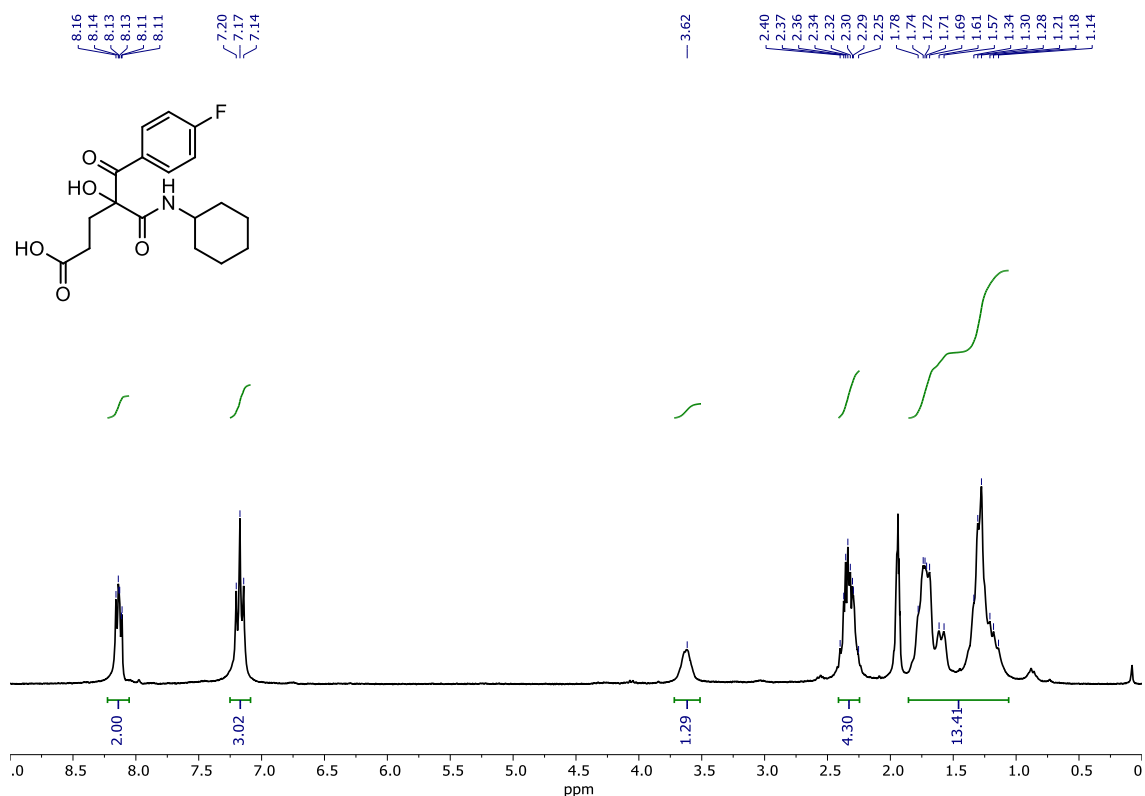

Figure 48. <sup>1</sup>H NMR spectrum of 12d (300 MHz, CD<sub>3</sub>CN).

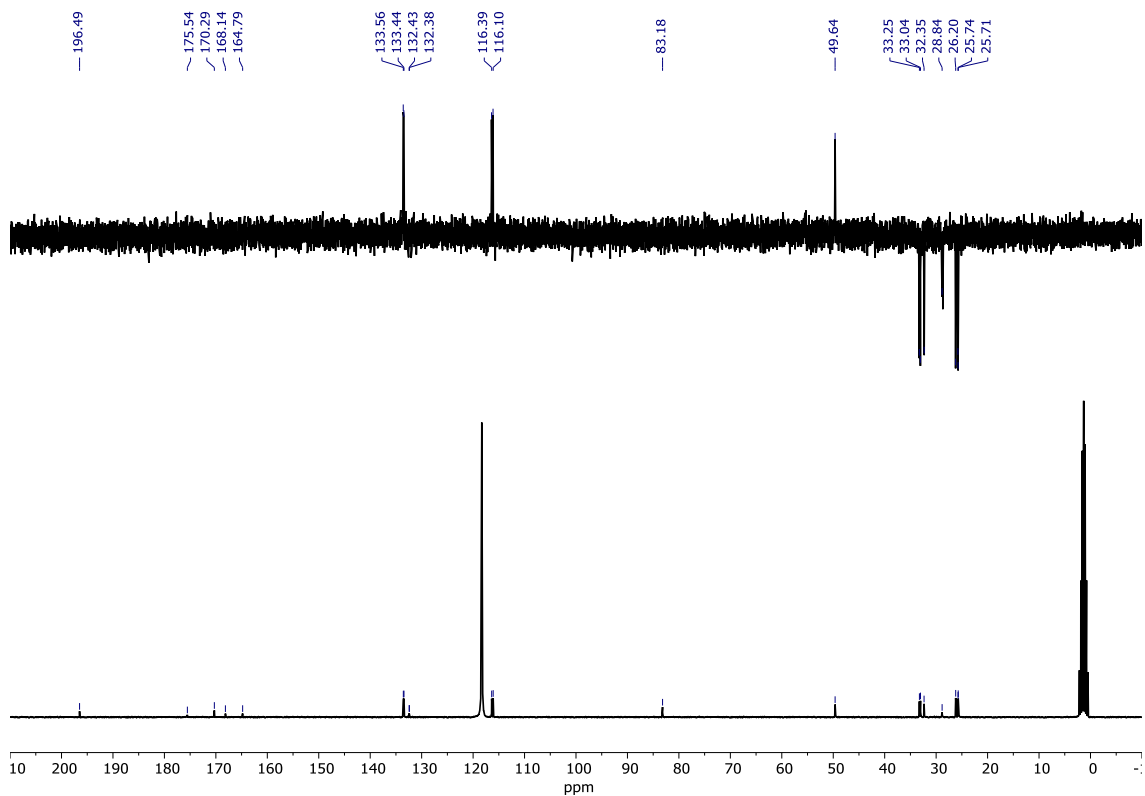

Figure 49. <sup>13</sup>C and DEPT-135 NMR spectra of 12d (75 MHz, CD<sub>3</sub>CN).

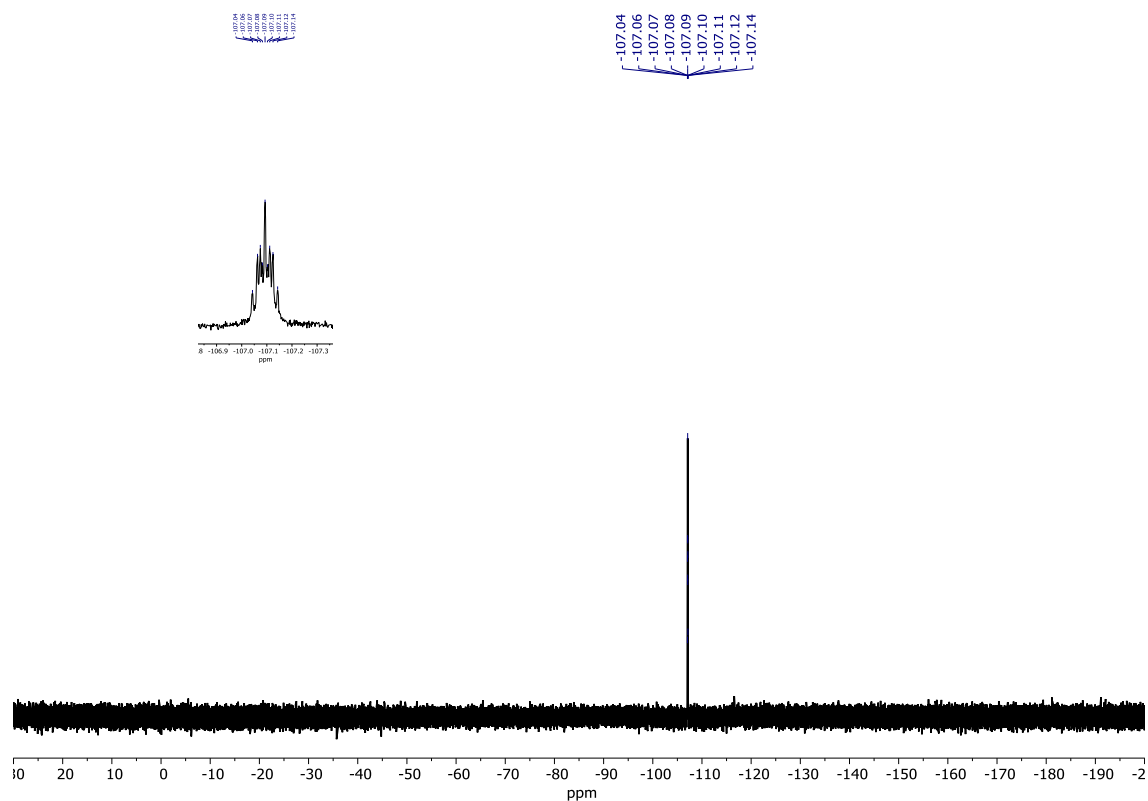

**Figure 50.**  $^{19}\text{F}$  NMR spectrum of **12d** (300 MHz,  $\text{CD}_3\text{CN}$ ).

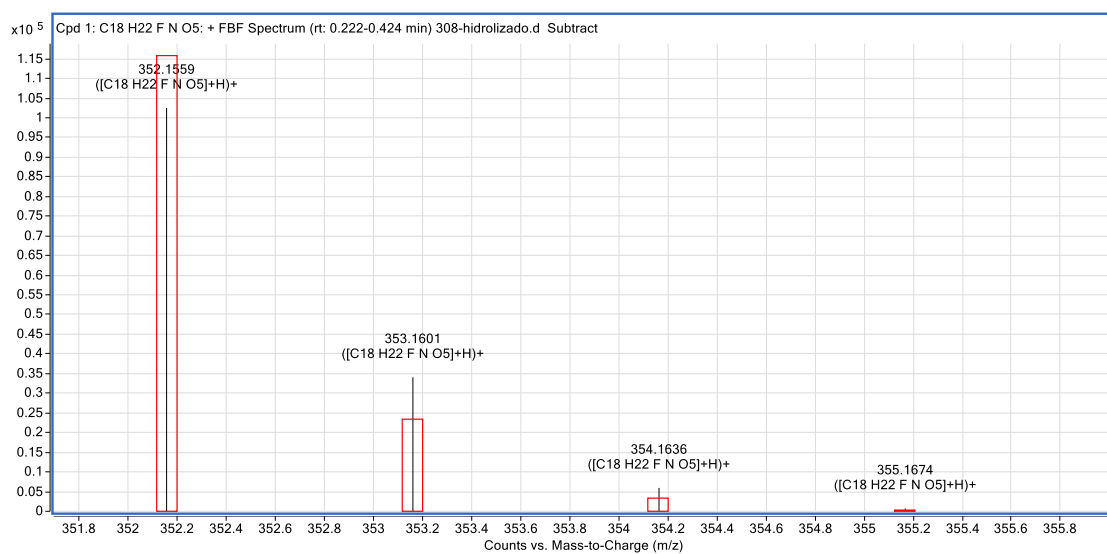

**Figure 51.** High-resolution mass spectrum of **12d**.

**Methyl 4-benzoyl-5-(cyclohexylamino)-4-hydroxy-5-oxopentanoate (13a)**

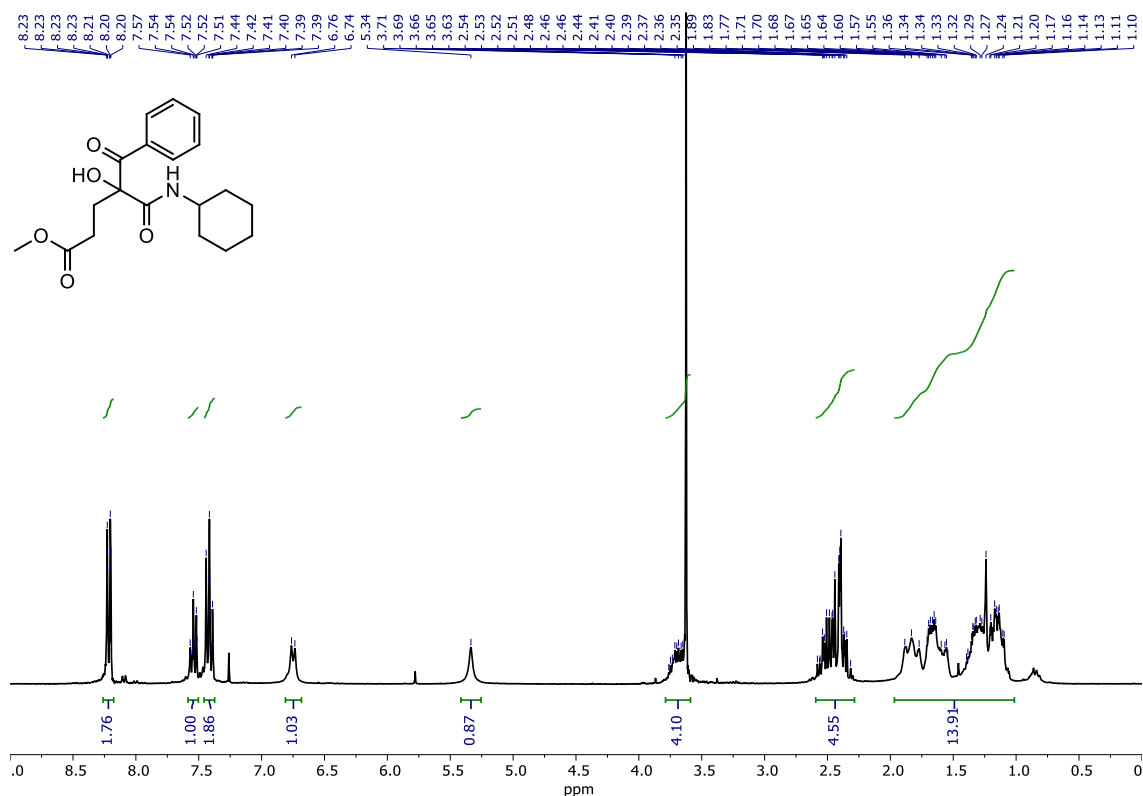

Figure 52. <sup>1</sup>H NMR spectrum of 13a (300 MHz, CDCl<sub>3</sub>).

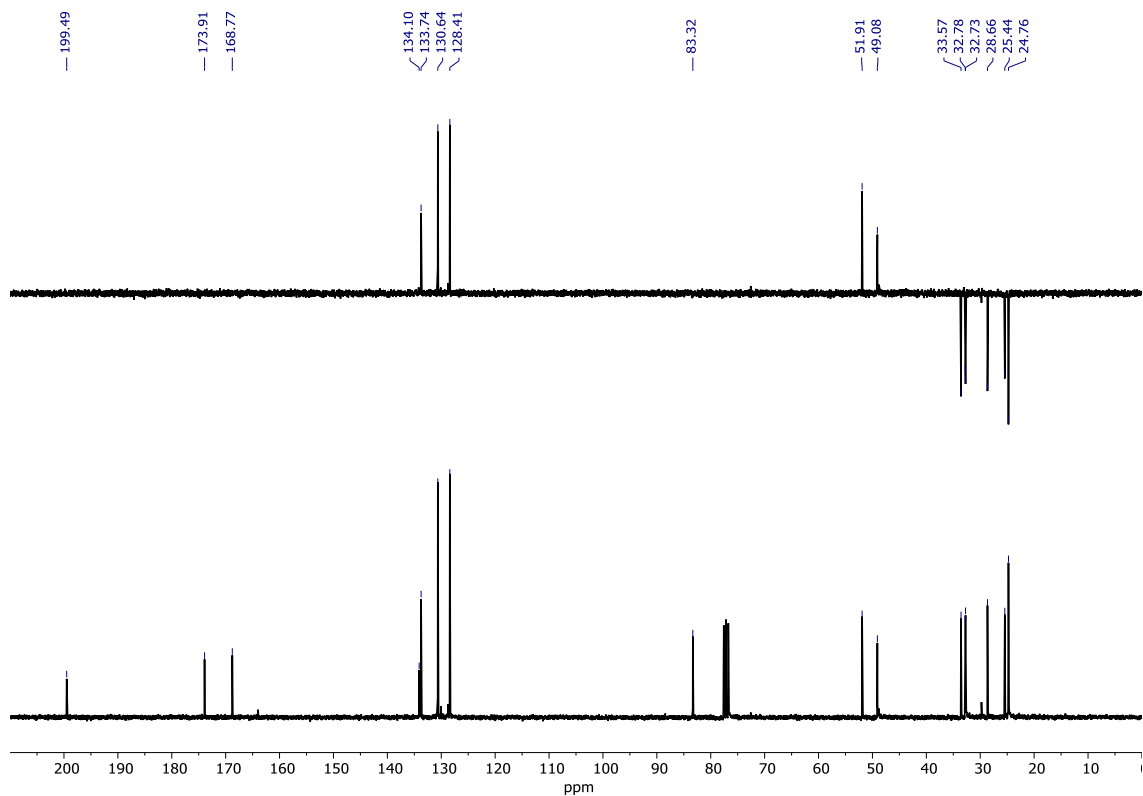

Figure 53. <sup>13</sup>C and DEPT-135 NMR spectra of 13a (75 MHz, CDCl<sub>3</sub>).

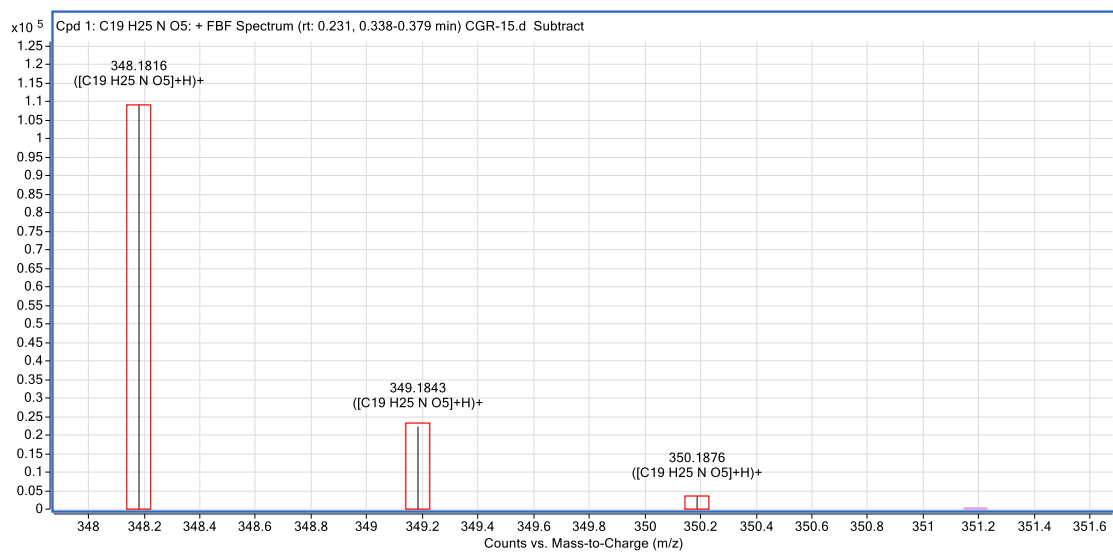

Figure 54. High-resolution mass spectrum of 13a.

**Methyl 4-benzoyl-5-(butylamino)-4-hydroxy-5-oxopentanoate (13b)**

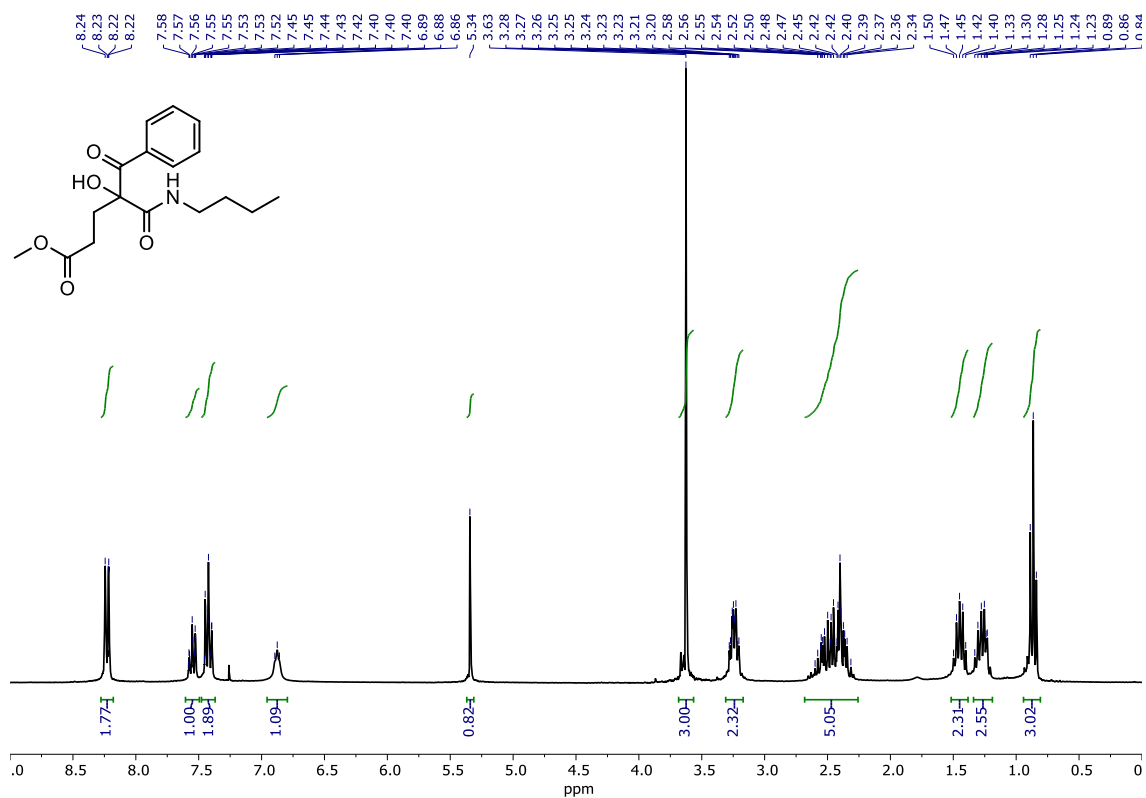

Figure 55. <sup>1</sup>H NMR spectrum of 13b (300 MHz, CDCl<sub>3</sub>).

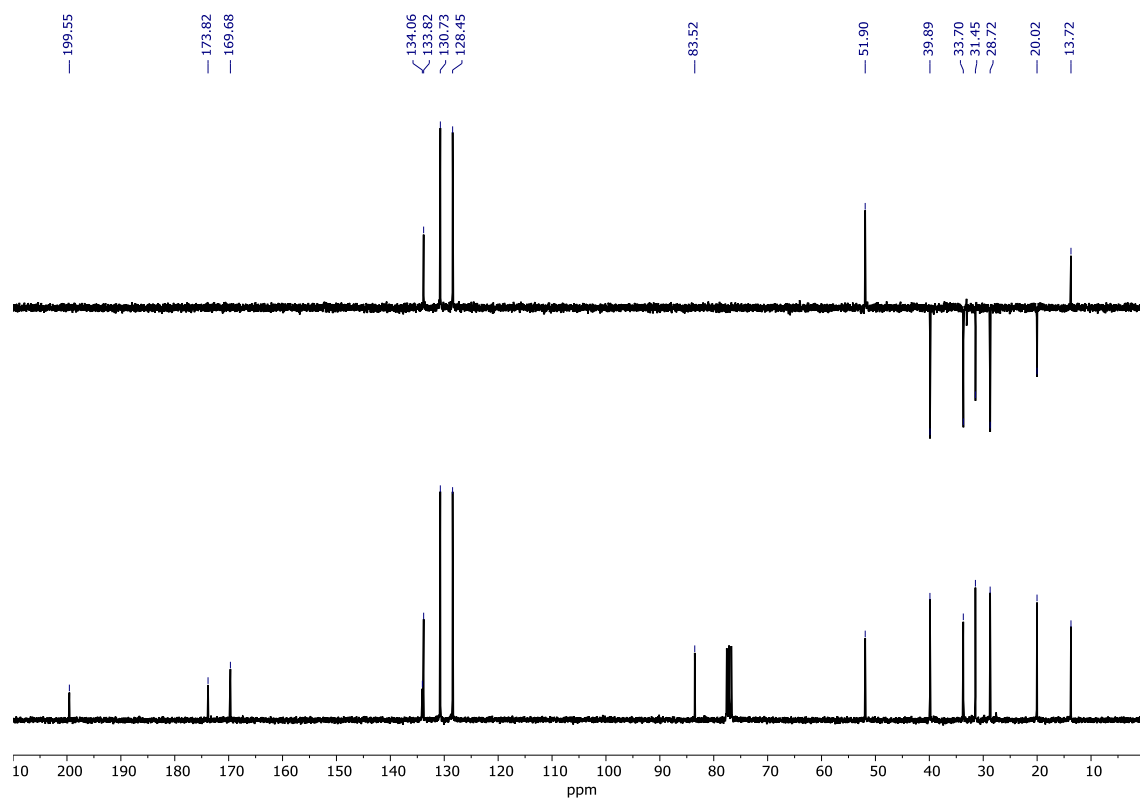

**Figure 56.**  $^{13}\text{C}$  and DEPT-135 NMR spectra of **13b** (75 MHz,  $\text{CDCl}_3$ ).

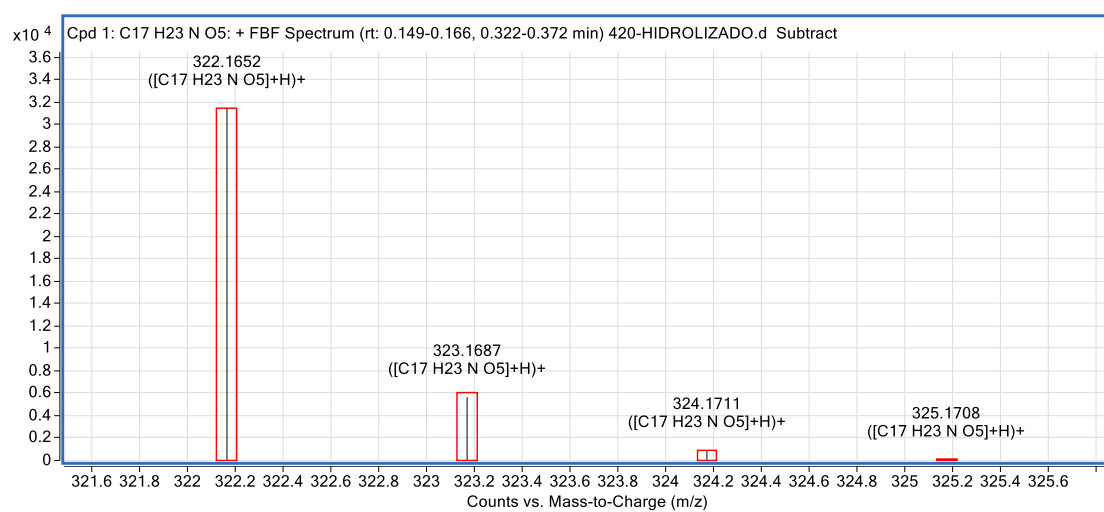

**Figure 57.** High-resolution mass spectrum of **13b**.

**Methyl 4-benzoyl-5-(*tert*-butylamino)-4-hydroxy-5-oxopentanoate (13c)**

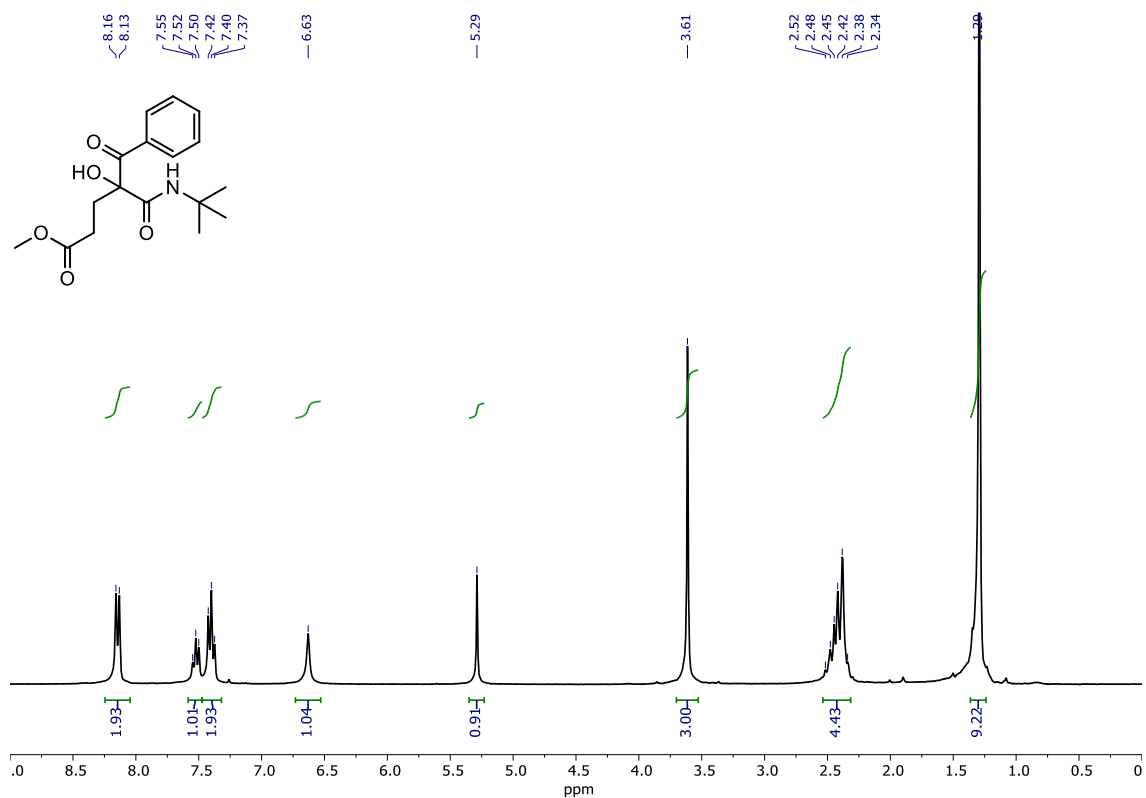

Figure 58.  $^1\text{H}$  NMR spectrum of **13c** (300 MHz,  $\text{CDCl}_3$ ).

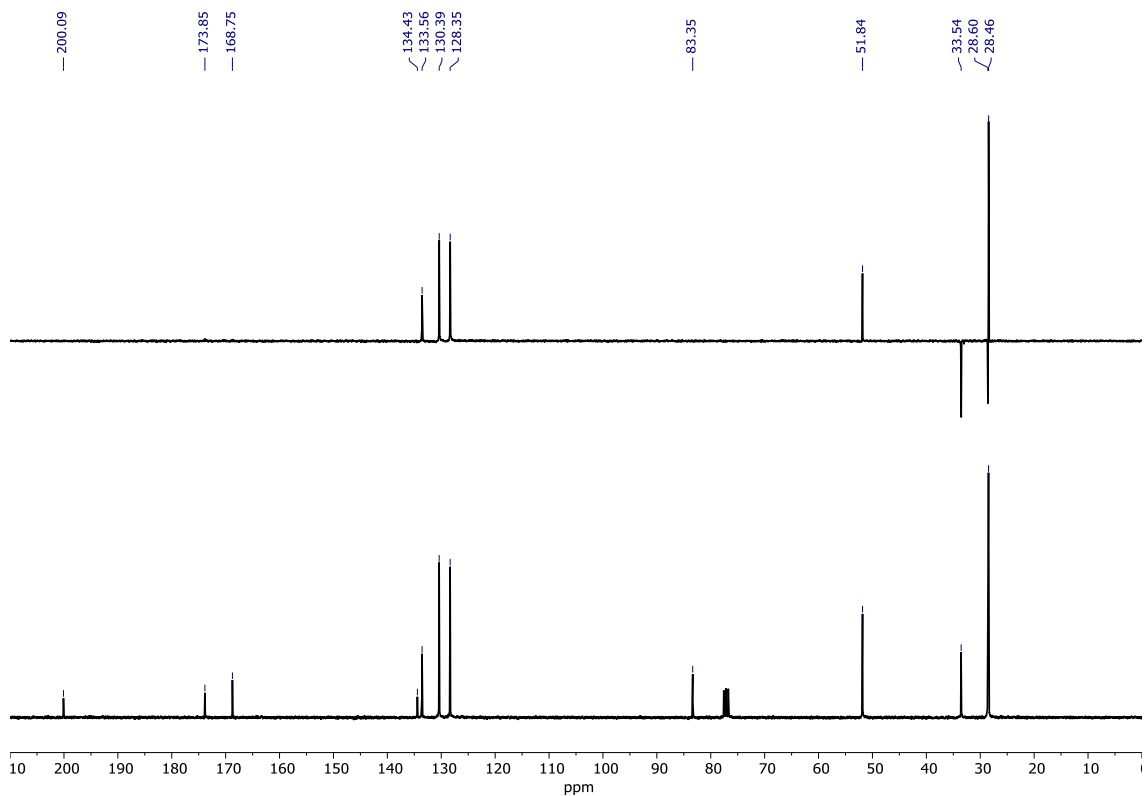

Figure 59.  $^{13}\text{C}$  and DEPT-135 NMR spectra of **13c** (75 MHz,  $\text{CDCl}_3$ ).

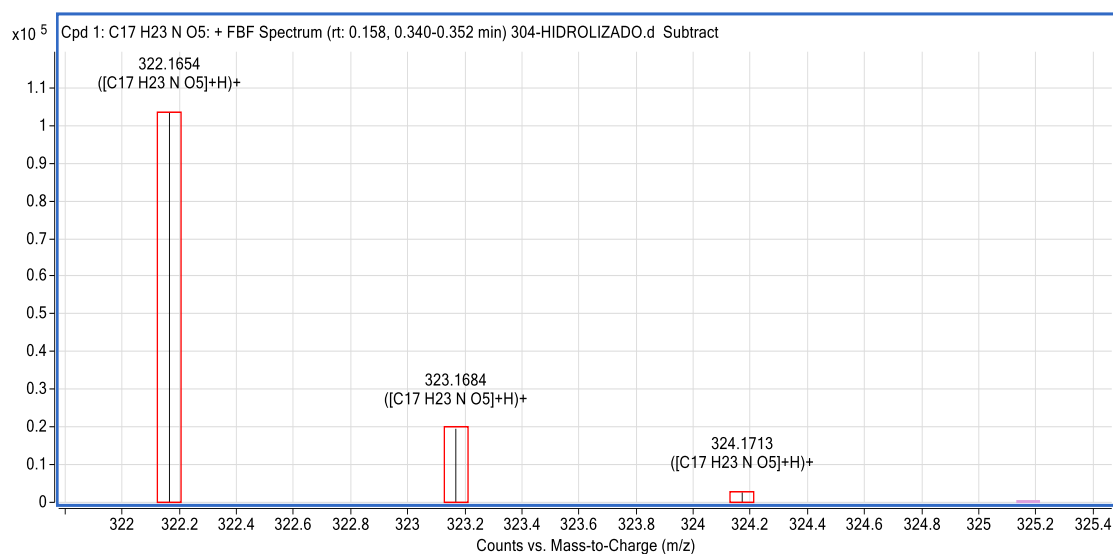

Figure 60. High-resolution mass spectrum of 13c.

**Methyl 5-(cyclohexylamino)-4-(4-fluorobenzoyl)-4-hydroxy-5-oxopentanoate (13d)**

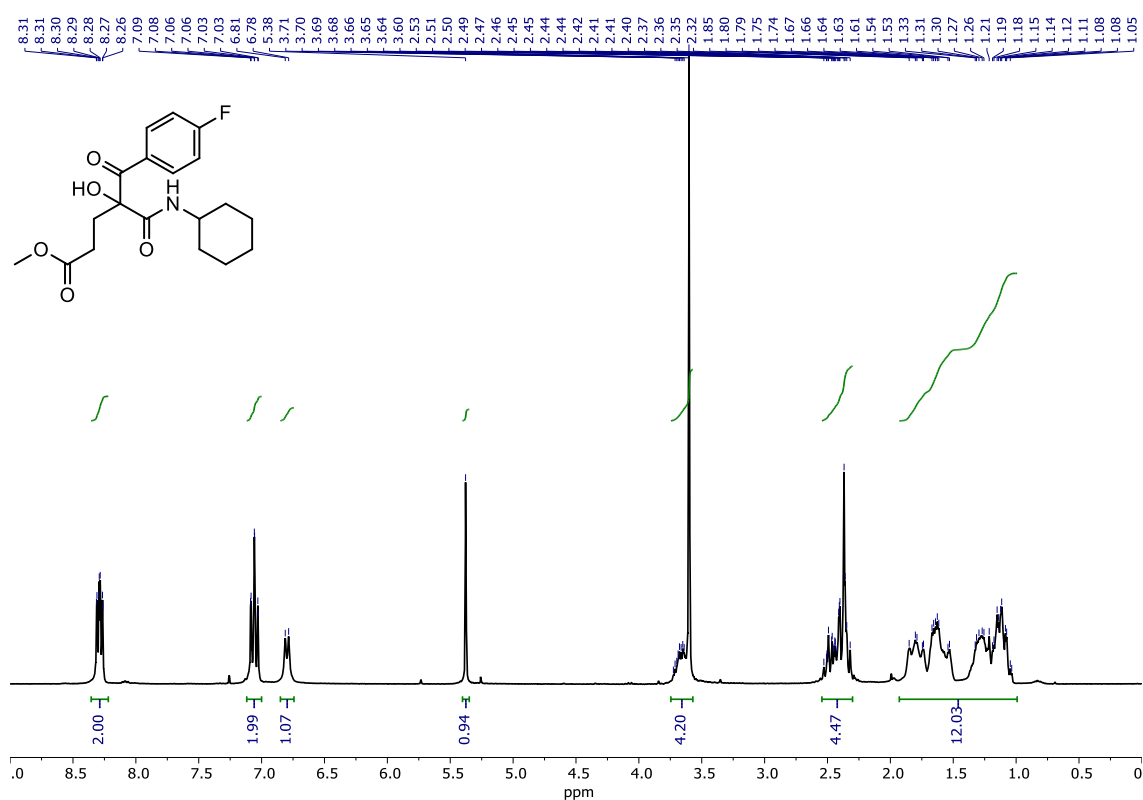

Figure 61.  $^1\text{H}$  NMR spectrum of 13d (300 MHz,  $\text{CDCl}_3$ ).

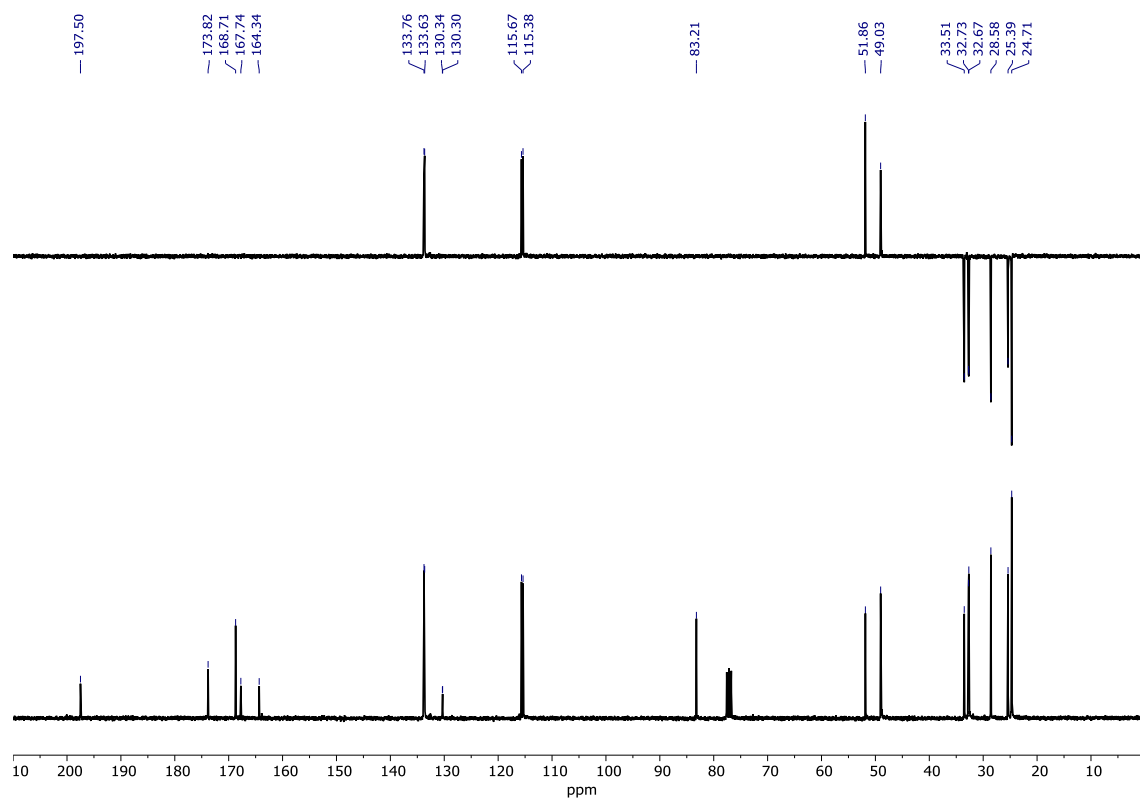

**Figure 62.**  $^{13}\text{C}$  and DEPT-135 NMR spectra of **13d** (75 MHz,  $\text{CDCl}_3$ ).

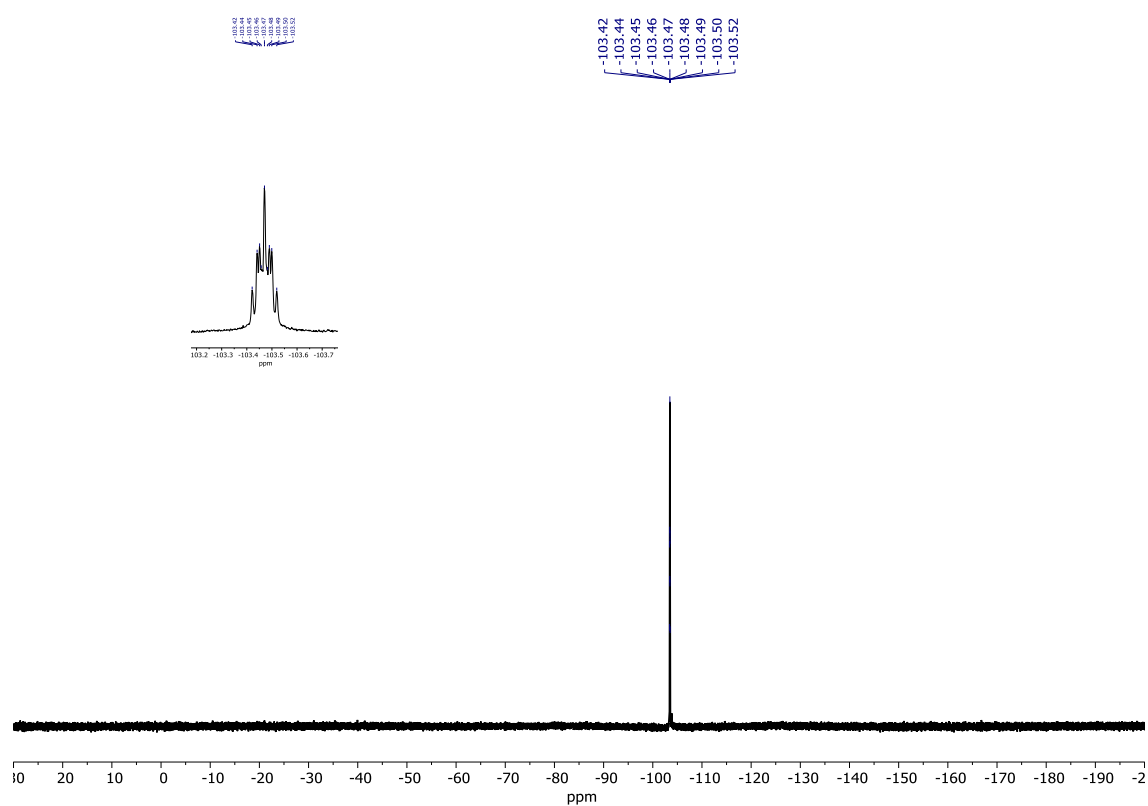

**Figure 63.**  $^{19}\text{F}$  NMR spectrum of **13d** (300 MHz,  $\text{CDCl}_3$ ).



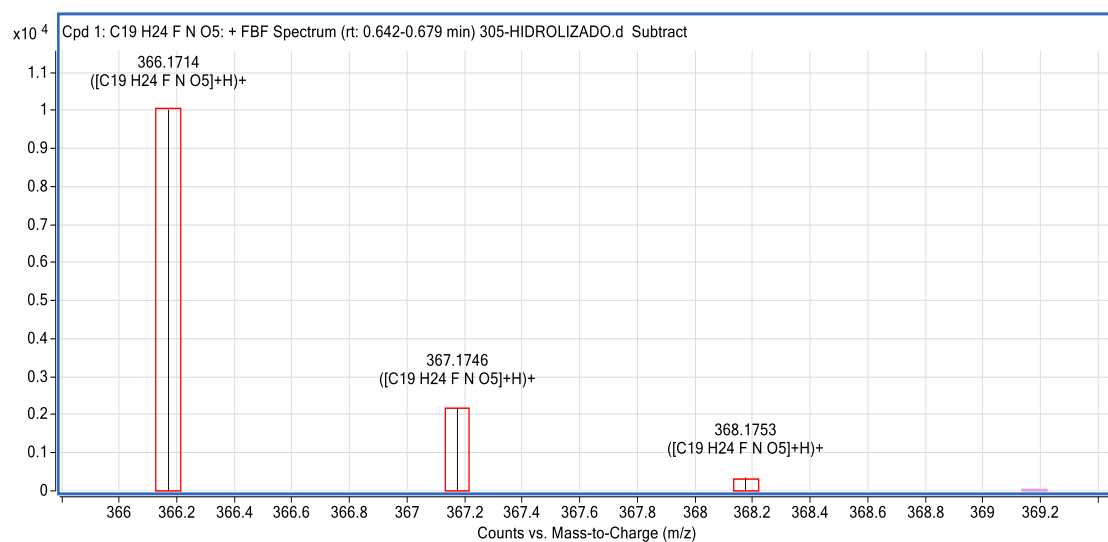

**Figure 64.** High-resolution mass spectrum of **13d**.

# X-ray diffraction studies

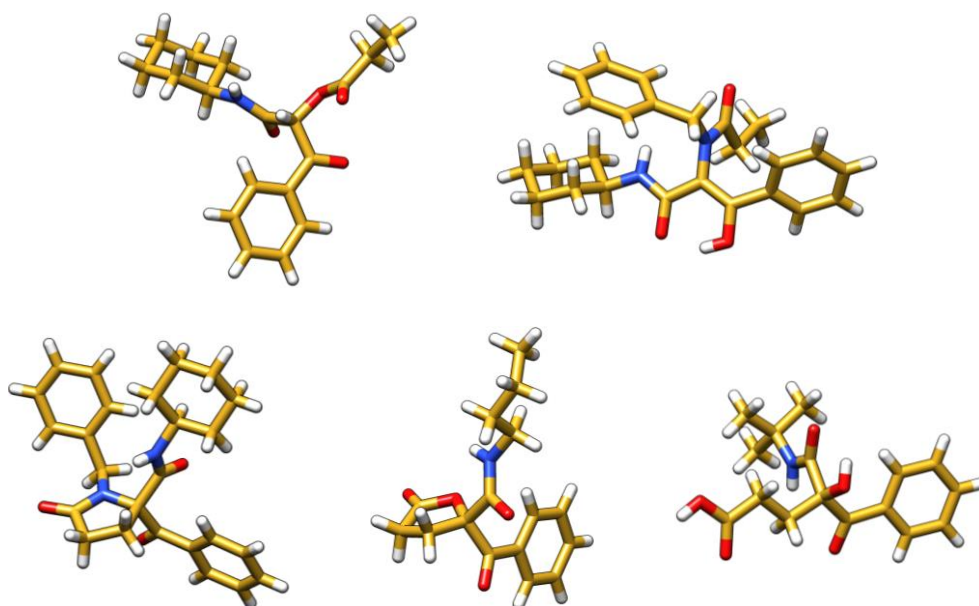

**Figure 65.** X-ray molecular structures of, from top to bottom and from left to right: **5**, **6**, **9**, **11b** and **12c**.

**Table 1.** Crystal data and refinement details for **5**, **6**, **9**, **11b** and **12c**.

|                                              | <b>5</b>                                        | <b>6</b>                                                      | <b>9</b>                                                      | <b>11b</b>                                      | <b>12c</b>                                      |
|----------------------------------------------|-------------------------------------------------|---------------------------------------------------------------|---------------------------------------------------------------|-------------------------------------------------|-------------------------------------------------|
| Empirical formula                            | C <sub>18</sub> H <sub>23</sub> NO <sub>4</sub> | C <sub>25</sub> H <sub>30</sub> N <sub>2</sub> O <sub>3</sub> | C <sub>25</sub> H <sub>28</sub> N <sub>2</sub> O <sub>3</sub> | C <sub>16</sub> H <sub>19</sub> NO <sub>4</sub> | C <sub>16</sub> H <sub>21</sub> NO <sub>5</sub> |
| MW                                           | 317.37                                          | 406.51                                                        | 404.49                                                        | 289.32                                          | 307.34                                          |
| crystal system                               | Orthorhombic                                    | Triclinic                                                     | Triclinic                                                     | Monoclinic                                      | Triclinic                                       |
| space group                                  | <i>Pbca</i>                                     | <i>P</i> -1                                                   | <i>P</i> -1                                                   | <i>P</i> 2 <sub>1</sub> / <i>c</i>              | <i>P</i> -1                                     |
| <i>T</i> /K                                  | 180(2)                                          | 180(2)                                                        | 300(2)                                                        | 180(2)                                          | 300(2)                                          |
| <i>a</i> /Å                                  | 18.006(7)                                       | 8.2365(3)                                                     | 10.213(3)                                                     | 15.244(3)                                       | 8.7365(4)                                       |
| <i>b</i> /Å                                  | 9.256(4)                                        | 10.4096(3)                                                    | 11.006(3)                                                     | 9.440(2)                                        | 9.1829(4)                                       |
| <i>c</i> /Å                                  | 21.003(8)                                       | 14.2434(4)                                                    | 11.207(3)                                                     | 10.755(3)                                       | 10.7628(4)                                      |
| $\alpha$ /deg                                | 90                                              | 83.253(2)                                                     | 105.448(9)                                                    | 90                                              | 93.773(2)                                       |
| $\beta$ /deg                                 | 90                                              | 74.934(2)                                                     | 114.550(8)                                                    | 93.678(16)                                      | 96.241(2)                                       |
| $\gamma$ /deg                                | 90                                              | 80.851(2)                                                     | 91.981(9)                                                     | 90                                              | 98.258(2)                                       |
| <i>V</i> /Å <sup>3</sup>                     | 3500(2)                                         | 1160.51(6)                                                    | 1089.2(5)                                                     | 1544.5(6)                                       | 846.53(6)                                       |
| <i>F</i> (000)                               | 1360                                            | 436                                                           | 432                                                           | 616                                             | 328                                             |
| <i>Z</i>                                     | 8                                               | 2                                                             | 2                                                             | 4                                               | 2                                               |
| $\lambda$ , Å                                | 1.54178                                         | 1.54178                                                       | 0.71073                                                       | 1.54178                                         | 0.71073                                         |
| <i>D</i> <sub>calc</sub> /g cm <sup>-3</sup> | 1.204                                           | 1.163                                                         | 1.233                                                         | 1.244                                           | 1.206                                           |
| $\mu$ /mm <sup>-1</sup>                      | 0.691                                           | 0.608                                                         | 0.081                                                         | 0.735                                           | 0.090                                           |
| $\theta$ range/deg                           | 4.87–65.18                                      | 5.18–68.23                                                    | 2.22–36.50                                                    | 2.90–66.56                                      | 2.86–30.58                                      |
| <i>R</i> <sub>int</sub>                      | 0.0623                                          | 0.0742                                                        | 0.0620                                                        | 0.0832                                          | 0.0747                                          |
| reflections measured                         | 44626                                           | 28031                                                         | 33628                                                         | 10975                                           | 24160                                           |
| unique reflections                           | 2946                                            | 4229                                                          | 10478                                                         | 2705                                            | 5170                                            |
| reflections observed                         | 2606                                            | 2277                                                          | 5728                                                          | 1390                                            | 2689                                            |
| GOF on <i>F</i> <sup>2</sup>                 | 1.062                                           | 1.046                                                         | 1.025                                                         | 1.021                                           | 1.020                                           |
| <i>R</i> 1 <sup>a</sup>                      | 0.0511                                          | 0.0601                                                        | 0.0643                                                        | 0.0711                                          | 0.0536                                          |
| <i>wR</i> 2 <sup>b</sup>                     | 0.1359                                          | 0.2378                                                        | 0.1916                                                        | 0.2489                                          | 0.1653                                          |
| Largest $\neq$ peak & hole/eÅ <sup>-3</sup>  | 0.145 and -0.191                                | 0.235 and -0.173                                              | 0.274 and -0.194                                              | 0.376 and -0.270                                | 0.146 and -0.158                                |

<sup>a</sup>  $R1 = \sum ||F_o| - |F_c|| / \sum |F_o|$ . <sup>b</sup>  $wR2$  (all data) =  $\{\sum [w(|F_o|^2 - |F_c|^2)^2] / \sum [w(F_o^4)]\}^{1/2}$

Single crystals were obtained by slow evaporation of a solution of the isolated compound in diisopropyl ether (**6**), acetone (**9**), a 1:1 chloroform-hexane mixture (**5** and **11b**) or acetonitrile (**12c**).

Three dimensional X-ray data were collected on a Bruker D8 VENTURE diffractometer. Data were corrected for absorption effects using the multi-scan method (SADABS).<sup>1</sup> Complex scattering factors were taken from the SHELXL-2016<sup>2</sup> program running under the WinGX program system<sup>3</sup> as implemented on a Pentium® computer. The five structures were solved with Superflip<sup>4</sup> and refined by full-matrix least-squares on F<sup>2</sup>. All hydrogen atoms, except those of the OH fragments of the hydroxyl and carboxyl groups of **12c**, and that of the OH fragment of the enol group of **6**, which were refined from electron density, were included in calculated positions and refined in riding mode. EXTI correction was used to complete the refinement of the structure of **6**. Refinement converged with anisotropic displacement parameters for all non-hydrogen atoms. Crystal data and details on data collection and refinement are summarized in **Table 1**. The structures were drawn with the UCSF Chimera software.<sup>5</sup>

---

<sup>1</sup> SADABS: Krause, L.; Herbst-Irmer, R.; Sheldrick, G. M.; Stalke, D. *J. Appl. Cryst.* **2015**, *48*, 3-10.

<sup>2</sup> SHELX-2016: Sheldrick, G. M. *Acta Cryst.* **2008**, *A64*, 112-122.

<sup>3</sup> WinGX: Farrugia, L. J. *J. Appl. Cryst.* **1999**, *32*, 837-838.

<sup>4</sup> SUPERFLIP: Palatinus, L.; Chapuis, G. *J. Appl. Cryst.* **2007**, *40*, 786-790.

<sup>5</sup> UCSF Chimera: Pettersen, E. F.; Goddard, T. D.; Huang, C. C.; Couch, G. S.; Greenblatt, D. M.; Meng, E. C.; Ferrin, T. E. *J. Comput. Chem.* **2004**, *25*, 1605-1612.
